# Supplementary material for: A series of counter cation-dependent tetra β-diketonate mononuclear lanthanide(iii) single-molecule magnets and immobilization on pre-functionalised GaN substrates by anion exchange reaction
Source: Royal Society of Chemistry journal article supplement (doi:10.1039/d1tc01263k), 2021-01-01
Supplement: d1tc01263k2.pdf [file d1tc01263k2.pdf]

**Supporting Information**

**A series of counter cation dependent tetra  $\beta$ -diketonate mononuclear lanthanide(III) single-molecule magnets  
and immobilization on pre-functionalised GaN substrates by anion exchange reaction**

Zhuo-Wu,<sup>a</sup> Yong-Mei Tian,<sup>a</sup> Peng Chen,<sup>a</sup> Wen-Bin Sun <sup>a,\*</sup>, Bing-Wu Wang,<sup>b</sup> and Song Gao<sup>b</sup>

a. Key Laboratory of Functional Inorganic Material Chemistry Ministry of Education, School of Chemistry and Material Science Heilongjiang University, 74 Xuefu Road, Harbin 150080, P. R. China.

b. Beijing National Laboratory of Molecular Science, State Key Laboratory of Rare Earth Materials Chemistry and Applications, College of Chemistry and Molecular Engineering, Peking University, Beijing 100871, P. R. China

E-mail: [wenbinsun@126.com](mailto:wenbinsun@126.com)

**Table S1-S6.** Selected bond lengths (Å) and Angles (°) for **1-5****Table S1** Complex **1Tb**

|           |            |           |            |
|-----------|------------|-----------|------------|
| Tb1-O1    | 2.375(6)   | Tb1-O5    | 2.345(6)   |
| Tb1-O2    | 2.346(5)   | Tb1-O6    | 2.348(5)   |
| Tb1-O3    | 2.324(6)   | Tb1-O7    | 2.357(6)   |
| Tb1-O4    | 2.341(5)   | Tb1-O8    | 2.352(5)   |
| O2-Tb1-O1 | 70.0(2)    | O4-Tb1-O6 | 146.0(2)   |
| O2-Tb1-O6 | 75.22(18)  | O4-Tb1-O7 | 140.25(19) |
| O2-Tb1-O7 | 79.90(19)  | O4-Tb1-O8 | 76.97(18)  |
| O2-Tb1-O8 | 144.2(2)   | O5-Tb1-O1 | 74.8(2)    |
| O3-Tb1-O1 | 112.55(18) | O5-Tb1-O2 | 134.21(19) |
| O3-Tb1-O2 | 75.95(18)  | O5-Tb1-O6 | 71.1(2)    |
| O3-Tb1-O4 | 71.3(2)    | O5-Tb1-O7 | 116.14(19) |
| O3-Tb1-O5 | 146.47(18) | O5-Tb1-O8 | 79.2(2)    |
| O3-Tb1-O6 | 141.1(2)   | O6-Tb1-O1 | 81.06(18)  |
| O3-Tb1-O7 | 78.3(2)    | O6-Tb1-O7 | 71.3(2)    |
| O3-Tb1-O8 | 77.27(19)  | O6-Tb1-O8 | 114.13(16) |
| O4-Tb1-O1 | 73.79(18)  | O7-Tb1-O1 | 143.43(18) |
| O4-Tb1-O2 | 115.49(17) | O8-Tb1-O1 | 143.5(2)   |
| O4-Tb1-O5 | 80.4(2)    | O8-Tb1-O7 | 71.77(19)  |

**Table S2** Complex **1Nd**

|           |            |           |            |
|-----------|------------|-----------|------------|
| Nd1-O1    | 2.415(3)   | Nd1-O5    | 2.408(3)   |
| Nd1-O2    | 2.426(3)   | Nd1-O6    | 2.450(3)   |
| Nd1-O3    | 2.413(3)   | Nd1-O7    | 2.410(3)   |
| Nd1-O4    | 2.433(3)   | Nd1-O8    | 2.415(3)   |
| O1-Nd1-O2 | 68.91(11)  | O5-Nd1-O4 | 77.43(11)  |
| O1-Nd1-O4 | 81.84(11)  | O5-Nd1-O6 | 75.38(11)  |
| O1-Nd1-O6 | 74.61(12)  | O5-Nd1-O7 | 117.03(12) |
| O2-Nd1-O4 | 112.28(11) | O5-Nd1-O8 | 69.42(11)  |
| O2-Nd1-O6 | 81.20(11)  | O7-Nd1-O1 | 132.32(11) |
| O3-Nd1-O1 | 116.43(12) | O7-Nd1-O2 | 76.16(12)  |
| O3-Nd1-O2 | 72.02(12)  | O7-Nd1-O3 | 80.40(12)  |
| O3-Nd1-O4 | 69.25(11)  | O7-Nd1-O4 | 142.87(13) |
| O3-Nd1-O6 | 143.16(11) | O7-Nd1-O6 | 68.74(11)  |
| O3-Nd1-O8 | 80.54(12)  | O7-Nd1-O8 | 76.63(11)  |
| O4-Nd1-O6 | 146.47(11) | O8-Nd1-O1 | 146.43(11) |
| O5-Nd1-O1 | 80.37(11)  | O8-Nd1-O2 | 143.97(12) |
| O5-Nd1-O2 | 145.35(11) | O8-Nd1-O4 | 77.70(11)  |
| O5-Nd1-O3 | 139.04(11) | O8-Nd1-O6 | 110.02(11) |

**Table S3** Complex **2**

|           |           |           |           |
|-----------|-----------|-----------|-----------|
| Dy1-O2    | 2.328(2)  | Dy1-O5    | 2.331(2)  |
| Dy1-O3    | 2.338(2)  | Dy1-O1    | 2.350(2)  |
| Dy1-O8    | 2.351(2)  | Dy1-O4    | 2.370(2)  |
| Dy1-O6    | 2.389(2)  | Dy1-O7    | 2.368(2)  |
| Dy2-O13   | 2.347(2)  | Dy2-O12   | 2.354(2)  |
| Dy2-O15   | 2.336(2)  | Dy2-O11   | 2.346(2)  |
| Dy2-O10   | 2.356(2)  | Dy2-O9    | 2.364(3)  |
| Dy2-O14   | 2.384(2)  | Dy2-O16   | 2.390(2)  |
| O2-Dy1-O5 | 131.92(8) | O2-Dy1-O3 | 79.46(8)  |
| O5-Dy1-O3 | 144.76(8) | O2-Dy1-O1 | 70.43(8)  |
| O5-Dy1-O1 | 77.08(8)  | O3-Dy1-O1 | 106.02(8) |
| O2-Dy1-O8 | 75.15(9)  | O5-Dy1-O8 | 120.91(9) |
| O3-Dy1-O8 | 77.64(9)  | O1-Dy1-O8 | 143.85(8) |
| O2-Dy1-O7 | 143.20(8) | O5-Dy1-O7 | 79.70(8)  |
| O3-Dy1-O7 | 79.10(8)  | O1-Dy1-O7 | 144.82(8) |
| O8-Dy1-O7 | 71.27(8)  | O2-Dy1-O4 | 124.64(9) |
| O5-Dy1-O4 | 75.75(8)  | O3-Dy1-O4 | 71.86(9)  |
| O1-Dy1-O4 | 73.49(8)  | O8-Dy1-O4 | 138.21(8) |
| O7-Dy1-O4 | 75.41(8)  | O2-Dy1-O6 | 74.31(8)  |
| O5-Dy1-O6 | 70.02(8)  | O3-Dy1-O6 | 144.01(8) |

|             |           |             |           |
|-------------|-----------|-------------|-----------|
| O1-Dy1-O6   | 88.02(8)  | O8-Dy1-O6   | 72.16(8)  |
| O7-Dy1-O6   | 108.37(8) | O4-Dy1-O6   | 143.98(8) |
| O11-Dy2-O15 | 92.23(9)  | O15-Dy2-O13 | 101.26(8) |
| O11-Dy2-O13 | 145.97(8) | O15-Dy2-O12 | 142.35(9) |
| O11-Dy2-O12 | 75.01(8)  | O13-Dy2-O12 | 75.32(8)  |
| O15-Dy2-O10 | 75.29(9)  | O11-Dy2-O10 | 70.28(9)  |
| O13-Dy2-O10 | 143.31(8) | O12-Dy2-O10 | 129.29(9) |
| O15-Dy2-O9  | 146.68(8) | O11-Dy2-O9  | 100.90(9) |
| O13-Dy2-O9  | 84.73(8)  | O12-Dy2-O9  | 70.96(9)  |
| O10-Dy2-O9  | 80.54(8)  | O15-Dy2-O14 | 77.10(8)  |
| O11-Dy2-O14 | 143.33(8) | O13-Dy2-O14 | 70.61(8)  |
| O12-Dy2-O14 | 132.70(8) | O10-Dy2-O14 | 73.07(8)  |
| O9-Dy2-O14  | 74.11(9)  | O15-Dy2-O16 | 70.28(9)  |
| O11-Dy2-O16 | 74.85(8)  | O13-Dy2-O16 | 80.53(8)  |
| O12-Dy2-O16 | 72.20(9)  | O10-Dy2-O16 | 129.17(8) |
| O9-Dy2-O16  | 142.69(8) | O14-Dy2-O16 | 130.69(8) |

**Table S4** Complex 3

|           |            |           |            |
|-----------|------------|-----------|------------|
| Dy1-O4    | 2.3750(18) | Dy1-O2    | 2.3454(18) |
| Dy1-O6    | 2.3044(18) | Dy1-O5    | 2.3783(17) |
| Dy1-O3    | 2.3224(19) | Dy1-O7    | 2.3299(19) |
| Dy1-O1    | 2.3579(18) | Dy1-O8    | 2.3709(18) |
| O4-Dy1-O5 | 70.92(6)   | O1-Dy1-O4 | 139.74(6)  |
| O6-Dy1-O4 | 76.78(7)   | O1-Dy1-O5 | 122.35(6)  |
| O6-Dy1-O3 | 142.80(6)  | O1-Dy1-O8 | 77.88(6)   |
| O6-Dy1-O1 | 141.81(7)  | O7-Dy1-O4 | 75.38(6)   |
| O6-Dy1-O7 | 112.44(7)  | O7-Dy1-O1 | 77.21(6)   |
| O6-Dy1-O2 | 80.42(7)   | O7-Dy1-O2 | 141.30(6)  |
| O6-Dy1-O5 | 72.47(6)   | O7-Dy1-O5 | 143.76(7)  |
| O6-Dy1-O8 | 71.25(6)   | O7-Dy1-O8 | 71.73(7)   |
| O3-Dy1-O4 | 73.12(6)   | O2-Dy1-O4 | 142.73(6)  |
| O3-Dy1-O1 | 73.73(6)   | O2-Dy1-O1 | 72.06(6)   |
| O3-Dy1-O7 | 80.50(7)   | O2-Dy1-O5 | 74.30(6)   |
| O3-Dy1-O2 | 111.86(7)  | O2-Dy1-O8 | 79.22(6)   |
| O3-Dy1-O5 | 77.36(6)   | O8-Dy1-O4 | 119.54(6)  |
| O3-Dy1-O8 | 143.88(6)  | O8-Dy1-O4 | 137.87(6)  |

**Table S5** Complex 4

|             |            |             |            |
|-------------|------------|-------------|------------|
| Dy1—O23     | 2.318(6)   | Dy1—O22     | 2.344(6)   |
| Dy1—O21     | 2.319(6)   | Dy1—O24     | 2.357(5)   |
| Dy1—O19     | 2.323(5)   | Dy1—O18     | 2.360(5)   |
| Dy1—O20     | 2.343(6)   | Dy1—O17     | 2.365(5)   |
| Dy2—O13     | 2.346(6)   | Dy2—O12     | 2.333(6)   |
| Dy2—O16     | 2.354(6)   | Dy2—O9      | 2.340(6)   |
| Dy2—O14     | 2.366(5)   | Dy2—O10     | 2.340(5)   |
| Dy2—O11     | 2.402(6)   | Dy2—O15     | 2.343(6)   |
| Dy3—O8      | 2.323(5)   | Dy3—O5      | 2.351(6)   |
| Dy3—O3      | 2.327(6)   | Dy3—O6      | 2.367(5)   |
| Dy3—O2      | 2.338(6)   | Dy3—O7      | 2.371(5)   |
| Dy3—O1      | 2.347(6)   | Dy3—O4      | 2.379(7)   |
| O23—Dy1—O21 | 134.07(19) | O13—Dy2—O16 | 137.49(19) |
| O23—Dy1—O19 | 74.0(2)    | O12—Dy2—O14 | 72.07(19)  |
| O21—Dy1—O19 | 148.05(19) | O9—Dy2—O14  | 151.8(2)   |
| O23—Dy1—O20 | 116.5(2)   | O10—Dy2—O14 | 129.6(2)   |
| O21—Dy1—O20 | 80.6(2)    | O15—Dy2—O14 | 76.8(2)    |
| O19—Dy1—O20 | 71.22(19)  | O13—Dy2—O14 | 73.18(19)  |
| O23—Dy1—O22 | 75.8(2)    | O16—Dy2—O14 | 74.4(2)    |
| O21—Dy1—O22 | 71.1(2)    | O12—Dy2—O11 | 71.4(2)    |
| O19—Dy1—O22 | 139.8(2)   | O9—Dy2—O11  | 73.6(2)    |
| O20—Dy1—O22 | 147.7(2)   | O10—Dy2—O11 | 79.9(2)    |
| O23—Dy1—O24 | 71.0(2)    | O15—Dy2—O11 | 133.7(2)   |
| O21—Dy1—O24 | 74.54(19)  | O13—Dy2—O11 | 148.43(19) |
| O19—Dy1—O24 | 110.21(19) | O16—Dy2—O11 | 73.6(2)    |

|             |            |             |            |
|-------------|------------|-------------|------------|
| O20—Dy1—O24 | 73.65(19)  | O14—Dy2—O11 | 122.87(19) |
| O22—Dy1—O24 | 83.9(2)    | O8—Dy3—O3   | 144.8(2)   |
| O23—Dy1—O18 | 146.6(2)   | O8—Dy3—O2   | 75.2(2)    |
| O21—Dy1—O18 | 76.82(19)  | O3—Dy3—O2   | 80.2(2)    |
| O19—Dy1—O18 | 81.63(19)  | O8—Dy3—O1   | 116.3(2)   |
| O20—Dy1—O18 | 75.2(2)    | O3—Dy3—O1   | 77.7(3)    |
| O22—Dy1—O18 | 111.9(2)   | O2—Dy3—O1   | 71.3(2)    |
| O24—Dy1—O18 | 140.4(2)   | O8—Dy3—O5   | 136.7(2)   |
| O23—Dy1—O17 | 81.4(2)    | O3—Dy3—O5   | 75.6(2)    |
| O21—Dy1—O17 | 116.8(2)   | O2—Dy3—O5   | 144.5(2)   |
| O19—Dy1—O17 | 76.9(2)    | O1—Dy3—O5   | 78.4(2)    |
| O20—Dy1—O17 | 136.05(18) | O8—Dy3—O6   | 76.0(2)    |
| O22—Dy1—O17 | 72.9(2)    | O3—Dy3—O6   | 111.6(2)   |
| O24—Dy1—O17 | 147.57(19) | O2—Dy3—O6   | 141.93(19) |
| O18—Dy1—O17 | 70.9(2)    | O1—Dy3—O6   | 145.3(2)   |
| O12—Dy2—O9  | 135.8(2)   | O5—Dy3—O6   | 72.3(2)    |
| O12—Dy2—O10 | 75.6(2)    | O8—Dy3—O7   | 71.41(19)  |
| O9—Dy2—O10  | 72.3(2)    | O3—Dy3—O7   | 142.4(3)   |
| O12—Dy2—O15 | 148.3(2)   | O2—Dy3—O7   | 111.8(2)   |
| O9—Dy2—O15  | 75.8(2)    | O1—Dy3—O7   | 73.4(2)    |
| O10—Dy2—O15 | 122.0(2)   | O5—Dy3—O7   | 75.3(2)    |
| O12—Dy2—O13 | 91.5(2)    | O6—Dy3—O7   | 81.44(19)  |
| O9—Dy2—O13  | 105.1(2)   | O8—Dy3—O4   | 77.4(2)    |
| O10—Dy2—O13 | 70.1(2)    | O3—Dy3—O4   | 71.9(3)    |
| O15—Dy2—O13 | 73.3(2)    | O2—Dy3—O4   | 74.0(2)    |
| O12—Dy2—O16 | 103.9(2)   | O1—Dy3—O4   | 136.9(2)   |
| O9—Dy2—O16  | 91.1(2)    | O5—Dy3—O4   | 121.0(2)   |
| O10—Dy2—O16 | 151.9(2)   | O6—Dy3—O4   | 75.8(2)    |
| O15—Dy2—O16 | 73.1(2)    | O7—Dy3—O4   | 145.0(2)   |

**Table S6** Complx 5

|           |            |           |            |
|-----------|------------|-----------|------------|
| Dy1—O1    | 2.509(4)   | Dy1—O7    | 2.406(4)   |
| Dy1—O5    | 2.433(4)   | Dy1—O4    | 2.518(4)   |
| Dy1—O8    | 2.264(4)   | Dy1—O6    | 2.276(4)   |
| Dy1—O3    | 2.300(4)   | Dy1—O2    | 2.326(4)   |
| O1—Dy1—O4 | 153.89(15) | O7—Dy1—O1 | 66.65(15)  |
| O7—Dy1—O5 | 76.64(16)  | O7—Dy1—O4 | 138.89(15) |
| O5—Dy1—O1 | 137.63(14) | O5—Dy1—O4 | 67.17(14)  |
| O8—Dy1—O1 | 117.68(15) | O8—Dy1—O7 | 77.66(15)  |
| O8—Dy1—O5 | 71.72(14)  | O8—Dy1—O4 | 73.11(15)  |
| O8—Dy1—O6 | 140.13(16) | O8—Dy1—O3 | 135.27(15) |
| O8—Dy1—O2 | 79.77(15)  | O6—Dy1—O1 | 74.08(15)  |
| O6—Dy1—O7 | 73.04(15)  | O6—Dy1—O5 | 75.62(15)  |
| O6—Dy1—O4 | 114.00(15) | O6—Dy1—O3 | 81.21(15)  |
| O6—Dy1—O2 | 137.87(15) | O3—Dy1—O1 | 84.00(15)  |
| O3—Dy1—O7 | 145.05(15) | O3—Dy1—O5 | 119.60(15) |
| O3—Dy1—O4 | 73.37(15)  | O3—Dy1—O2 | 69.15(16)  |
| O2—Dy1—O1 | 73.65(15)  | O2—Dy1—O7 | 116.62(15) |
| O2—Dy1—O5 | 145.23(14) | O2—Dy1—O4 | 86.01(15)  |

**Table S7** Continuous Shape Measures (CSHMs) of the coordination geometry for Dy(III) ion in complex 1 (S values calculated with the Shape program). The S values indicated the proximity to the ideal polyhedron, thus, a S = 0 corresponds to the non-distorted polyhedron. The three closer ideal geometries to the real complexes are listed and below is the symmetry and description for each polyhedron.

| Complexes | s | polyhedron |
|-----------|---|------------|
|-----------|---|------------|

|            |     |       |                                               |
|------------|-----|-------|-----------------------------------------------|
| <b>1Nd</b> |     | 0.488 | SAPR-8, $D_{4d}$ , Square antiprism           |
|            |     | 1.943 | TDD-8, $D_{2d}$ , Triangular dodecahedron     |
|            |     | 2.198 | BTPR-8, $C_{2v}$ , Biaugmented trigonal prism |
| <b>1Tb</b> |     | 0.290 | SAPR-8, $D_{4d}$ , Square antiprism           |
|            |     | 2.123 | TDD-8, $D_{2d}$ , Triangular dodecahedron     |
|            |     | 2.265 | BTPR-8, $C_{2v}$ , Biaugmented trigonal prism |
| <b>2</b>   | Dy1 | 0.818 | SAPR-8, $D_{4d}$ , Square antiprism           |
|            |     | 1.076 | TDD-8, $D_{2d}$ , Triangular dodecahedron     |
|            |     | 1.725 | BTPR-8, $C_{2v}$ , Biaugmented trigonal prism |
|            | Dy2 | 0.457 | TDD-8, $D_{2d}$ , Triangular dodecahedron     |
|            |     | 1.989 | SAPR-8, $D_{4d}$ , Square antiprism           |
|            |     | 2.140 | BTPR-8, $C_{2v}$ , Biaugmented trigonal prism |
| <b>3</b>   |     | 0.343 | SAPR-8, $D_{4d}$ , Square antiprism           |
|            |     | 1.735 | TDD-8, $D_{2d}$ , Triangular dodecahedron     |
|            |     | 1.895 | BTPR-8, $C_{2v}$ , Biaugmented trigonal prism |
| <b>4</b>   | Dy1 | 0.478 | SAPR-8, $D_{4d}$ , Square antiprism           |
|            |     | 1.554 | TDD-8, $D_{2d}$ , Triangular dodecahedron     |
|            |     | 2.214 | BTPR-8, $C_{2v}$ , Biaugmented trigonal prism |
|            | Dy2 | 0.471 | TDD-8, $D_{2d}$ , Triangular dodecahedron     |
|            |     | 1.473 | SAPR-8, $D_{4d}$ , Square antiprism           |
|            |     | 2.369 | BTPR-8, $C_{2v}$ , Biaugmented trigonal prism |
|            | Dy3 | 0.298 | SAPR-8, $D_{4d}$ , Square antiprism           |
|            |     | 1.615 | TDD-8, $D_{2d}$ , Triangular dodecahedron     |
|            |     | 2.007 | BTPR-8, $C_{2v}$ , Biaugmented trigonal prism |

|   |       |                                               |
|---|-------|-----------------------------------------------|
| 5 | 0.746 | SAPR-8, $D_{4d}$ , Square antiprism           |
|   | 2.464 | TDD-8, $D_{2d}$ , Triangular dodecahedron     |
|   | 2.580 | BTPR-8, $C_{2v}$ , Biaugmented trigonal prism |

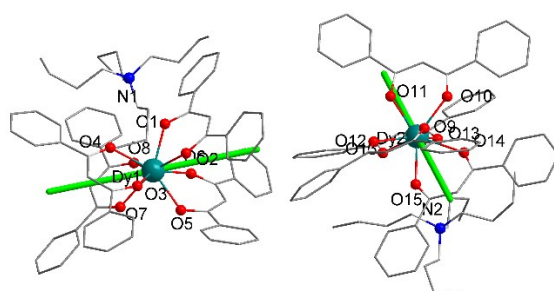

**Fig. S1** Orientations of the anisotropy axes for each of the two Dy(III) ions in complexes **2** as calculated by MAGELLAN.

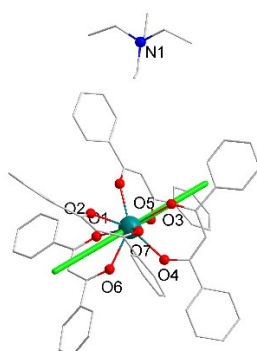

**Fig. S2** Orientations of the anisotropy axes for Dy(III) ion in complexes **3** as calculated by MAGELLAN.

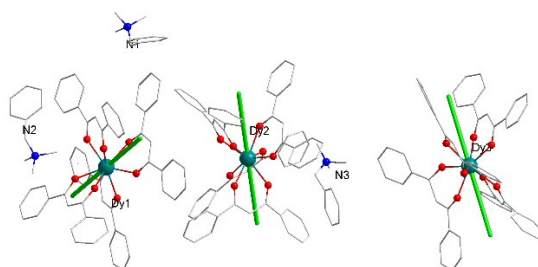

**Fig. S3** Orientations of the anisotropy axes for each of the three Dy(III) ions in complexes **4** as calculated by MAGELLAN.

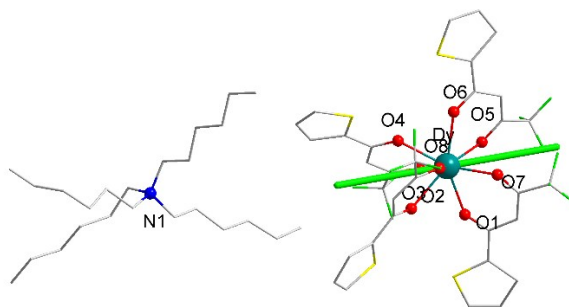

Fig. S4 Orientations of the anisotropy axes for each of Dy(III) ion in complexes **5** as calculated by MAGELLAN.

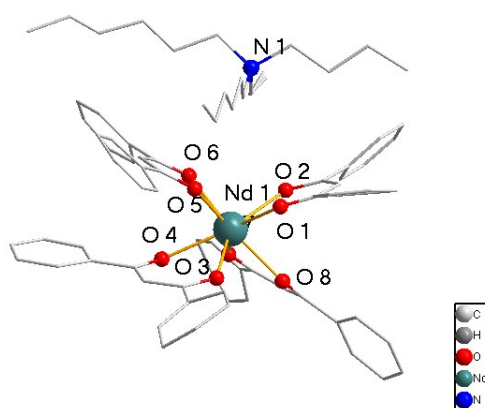

Fig. S5 The crystal structure of complex **1Nd** (hydrogen atoms are omitted for clarity).

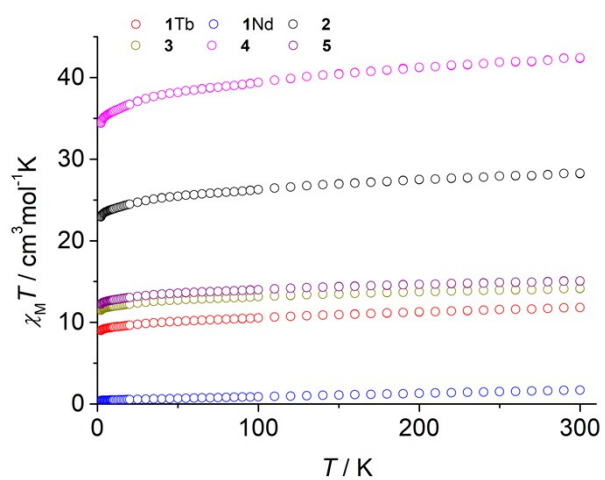

Fig. S6 experimental data of temperature dependence of the  $\chi_M T$  values of complexes **1-5**.

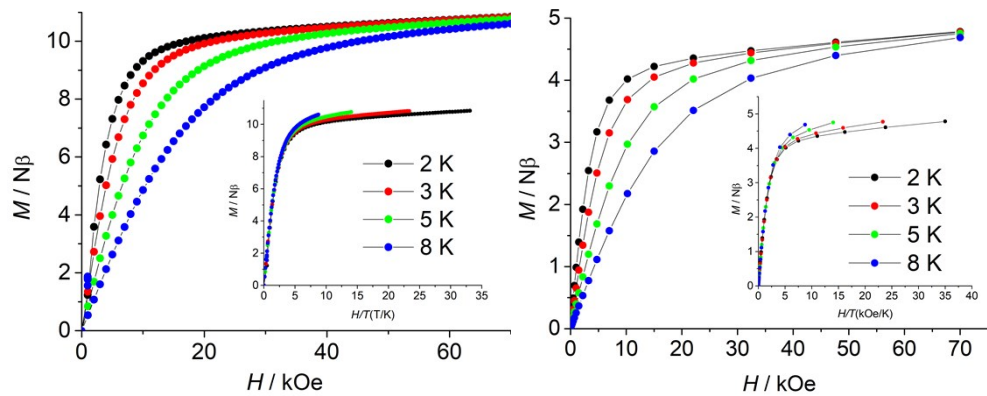

Fig. S7 Field dependence of the magnetization between 2 and 8 K for 2 and 3.

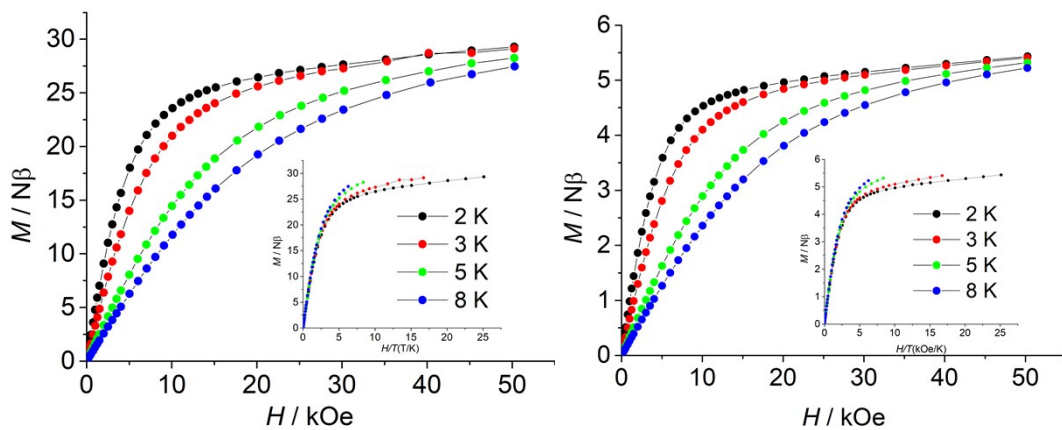

Fig. S8 Field dependence of the magnetization between 2 and 8 K for 4 and 5.

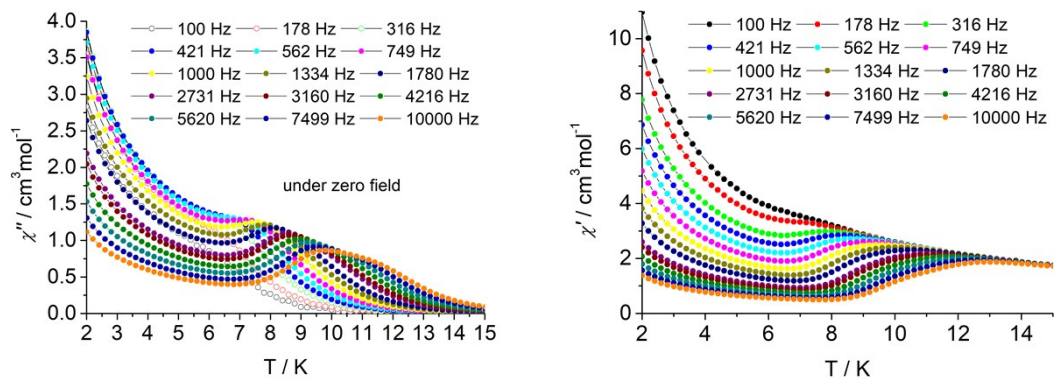

Fig. S9 The temperature dependence of the out-of-phase ( $\chi''$ ) ac susceptibility and in-phase ( $\chi'$ ) ac susceptibility of complex 2 under 0 Oe in the frequency range 1-10000 Hz.



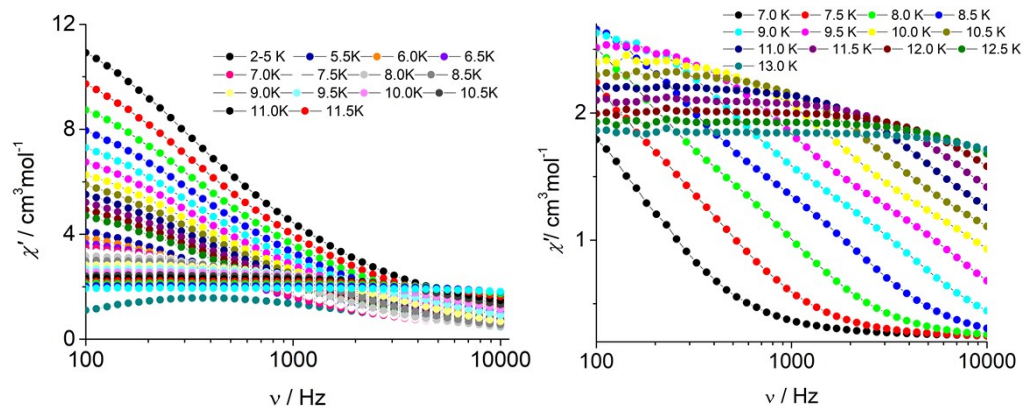

**Fig. S10** The frequency dependence of the in-phase ( $\chi'$ ) ac susceptibility of complex **2** under 0 Oe and 2000 Oe in the frequency range 1-10000 Hz.

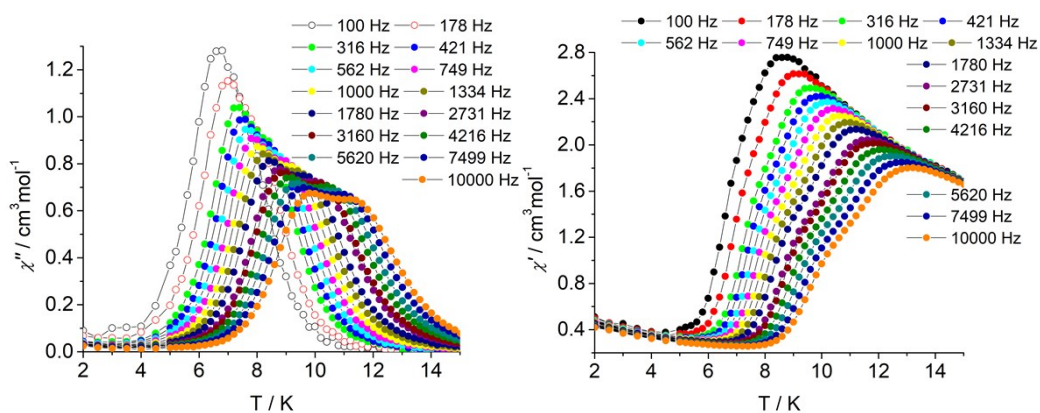

**Fig. S11** The temperature dependence of the out-of-phase ( $\chi''$ ) ac susceptibility and in-phase ( $\chi'$ ) ac susceptibility of complex **2** under 2000 Oe in the frequency range 1-10000 Hz.

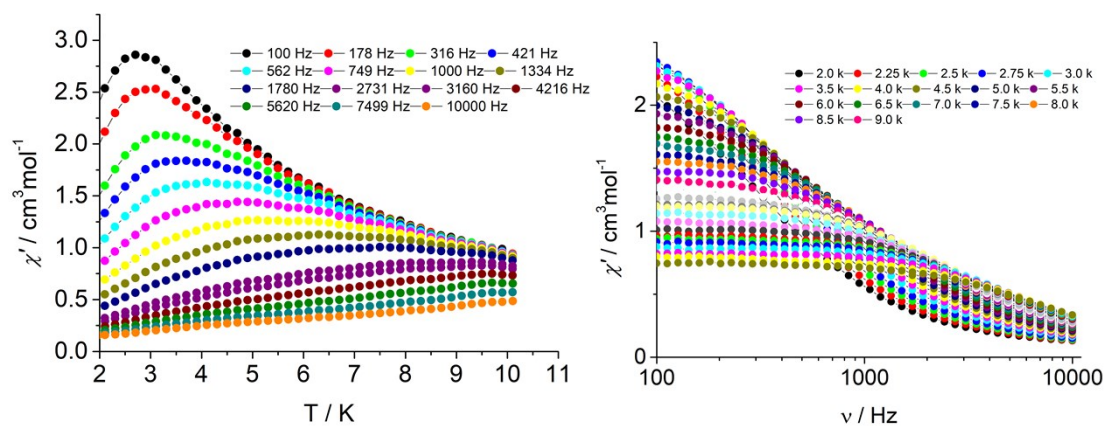

**Fig. S12** The temperature dependence and frequency dependence of the in-phase ( $\chi'$ ) ac susceptibility of complex **1Tb** under 1500 Oe in the frequency range 1-10000 Hz.

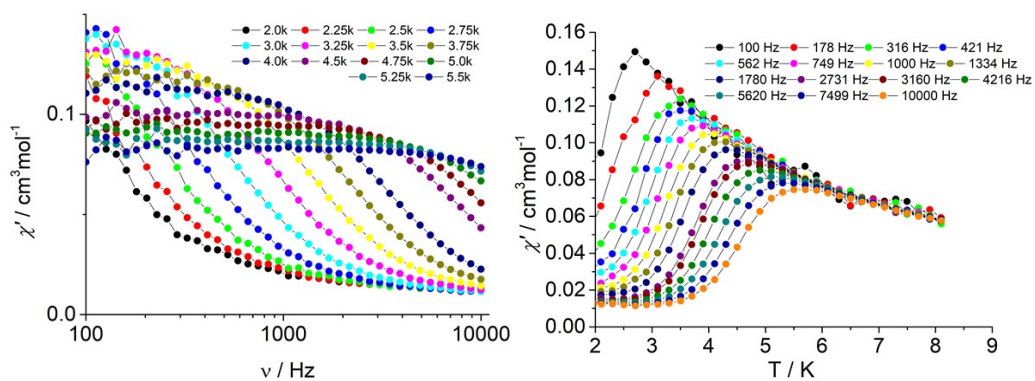

**Fig. S13** The temperature dependence and frequency dependence of the in-phase ( $\chi'$ ) ac susceptibility of complex **1Nd** under 2000 Oe in the frequency range 1-10000 Hz.

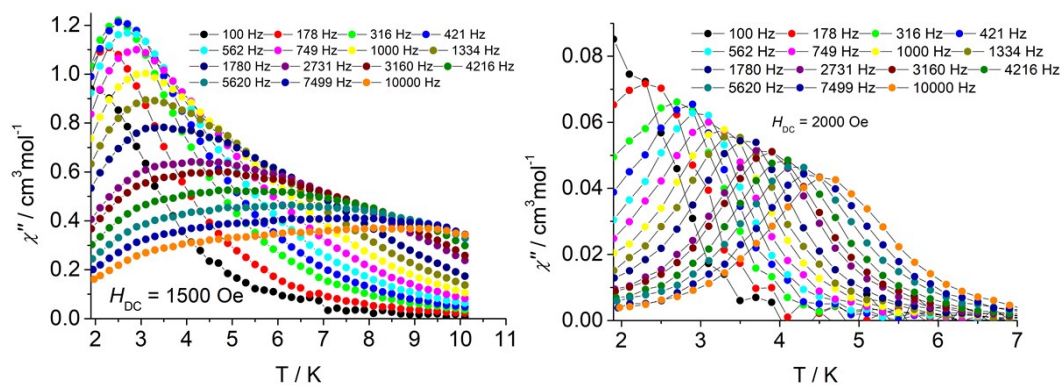

**Fig. S14** The temperature dependence of the out-of-phase ( $\chi''$ ) ac susceptibility of complex **1(Tb)** under 1500 Oe and the out-of-phase ( $\chi''$ ) ac susceptibility of complex **1(Nd)** under 2000 Oe in the frequency range 1-10000 Hz.

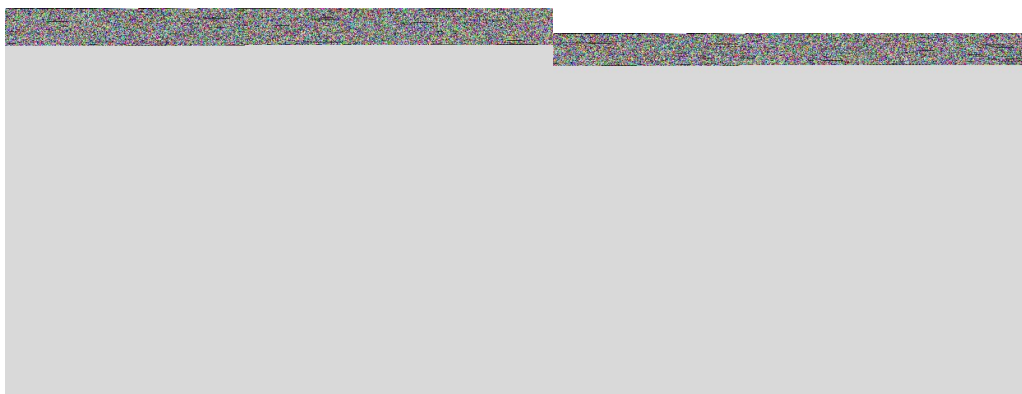

**Fig. S15** The temperature dependence of the in-phase ( $\chi'$ ) and the frequency dependence of the in-phase ( $\chi'$ ) ac susceptibility component under 1500 Oe for complex **1(Tb)**.

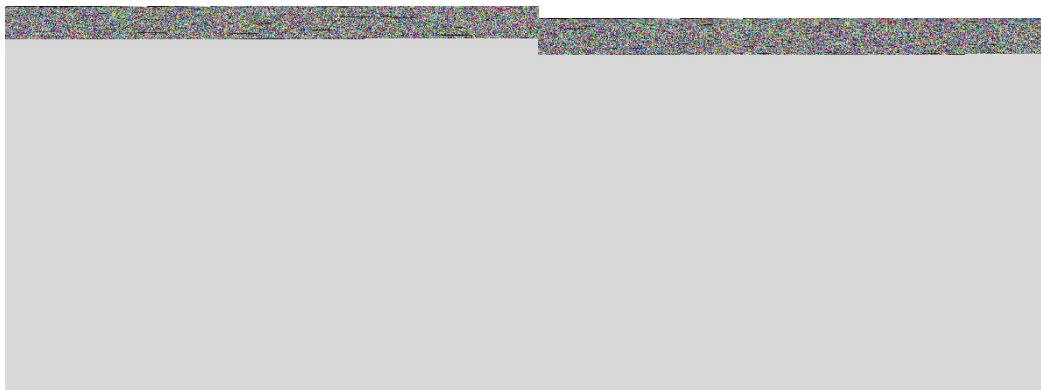

**Fig. S16** The temperature dependence of the in-phase ( $\chi'$ ) and the frequency dependence of the in-phase ( $\chi'$ ) ac susceptibility component under 2000 Oe for complex **1**(Nd).

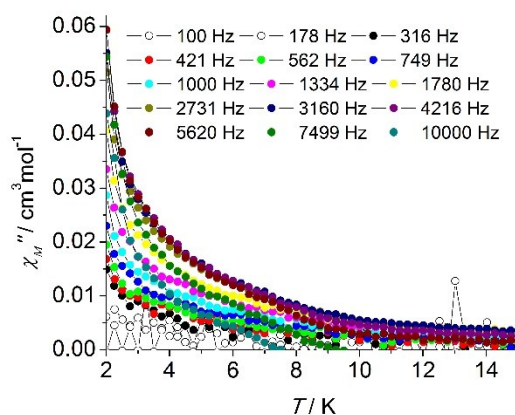

**Fig. S17** The temperature dependence of the in-phase ( $\chi''$ ) ac susceptibility component under 0 Oe for complex **3**.

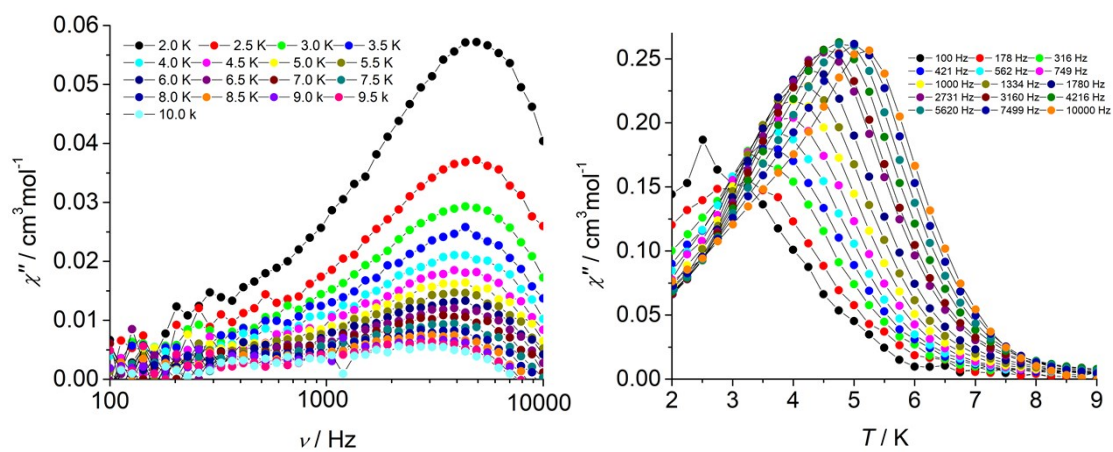

**Fig. S18** The frequency dependence of the out-of-phase ( $\chi''$ ) and the temperature dependence of the out-of-phase ( $\chi''$ ) ac susceptibility component under 4000 Oe for complex **3**.

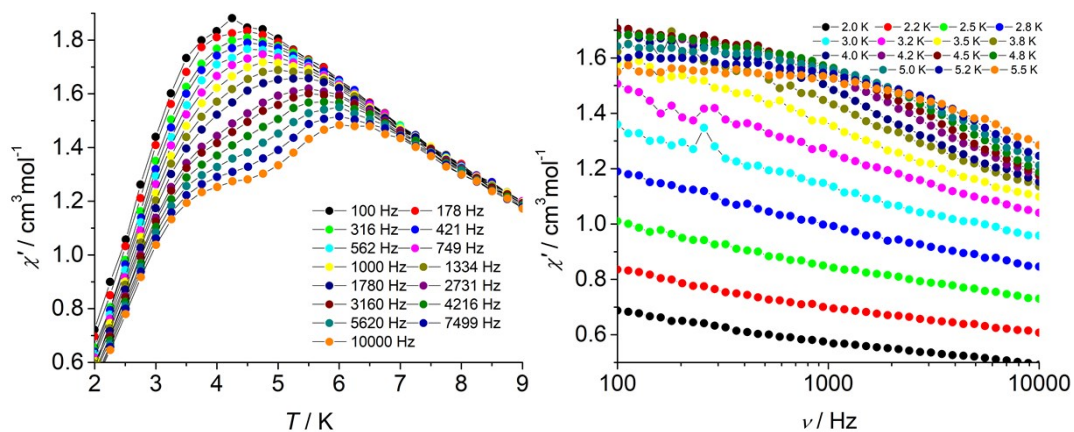

**Fig. S19** The temperature dependence of the in-phase ( $\chi'$ ) and the frequency dependence of the in-phase ( $\chi'$ ) ac susceptibility component under 4000 Oe for complex **3**.

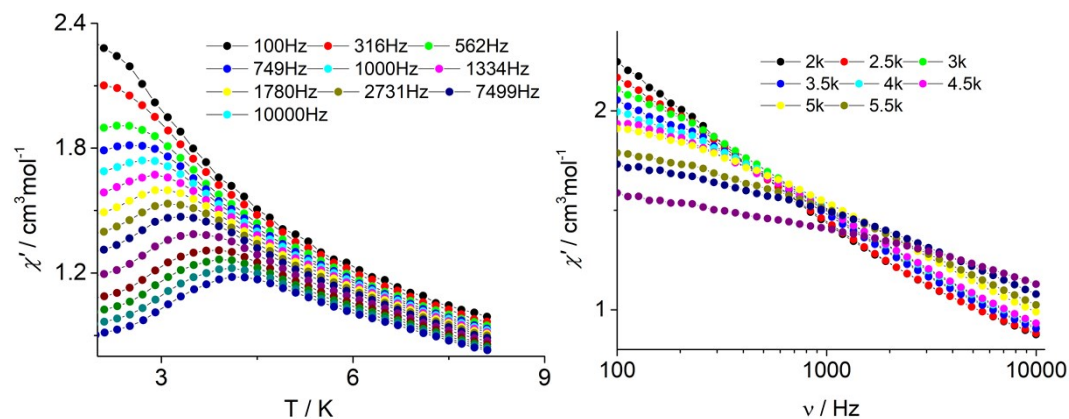

**Fig. S20** The temperature dependence of the in-phase ( $\chi'$ ) and the frequency dependence of the in-phase ( $\chi'$ ) ac susceptibility component under 900 Oe for complex **4**.

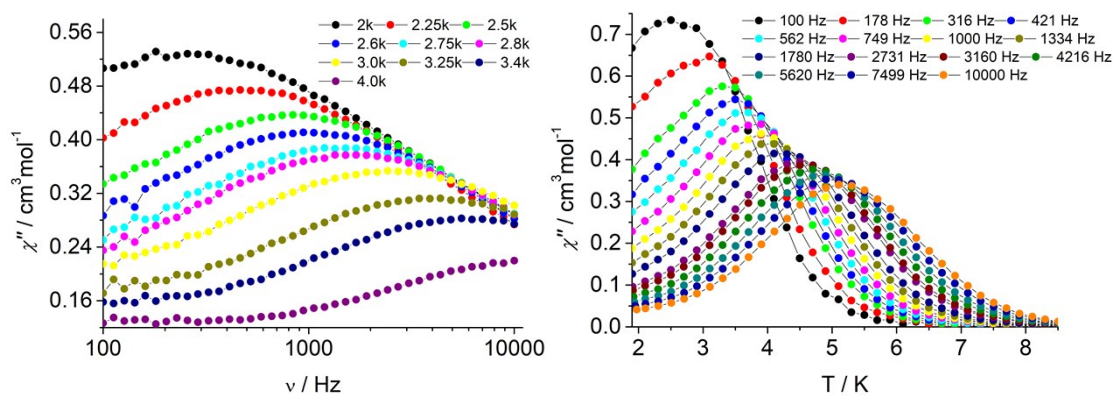

**Fig. S21** The frequency dependence of the out-of-phase ( $\chi''$ ) ac susceptibility component under 900 Oe for complex **4** and the temperature dependence of the out-of-phase ( $\chi''$ ) ac susceptibility component under 700 Oe for complex **5**.

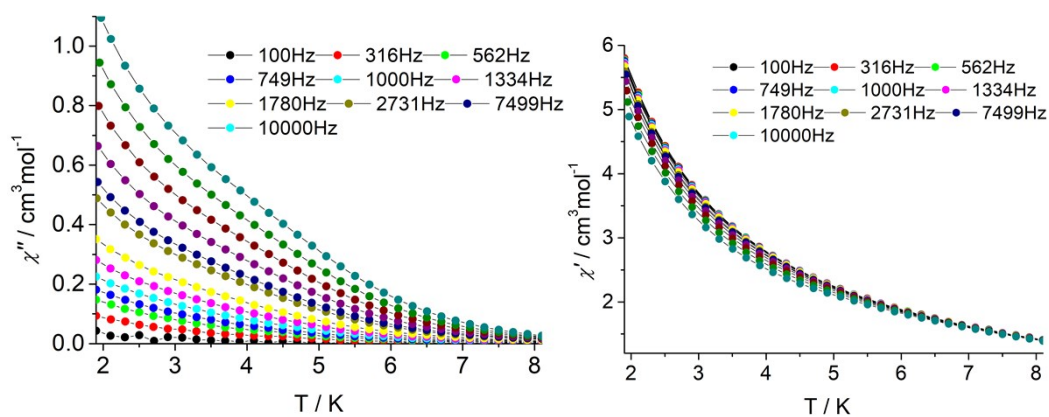

**Fig. S22** The temperature dependence of the out-of-phase ( $\chi''$ ) and the in-phase ( $\chi'$ ) ac susceptibility component under 0 Oe for complex 5.

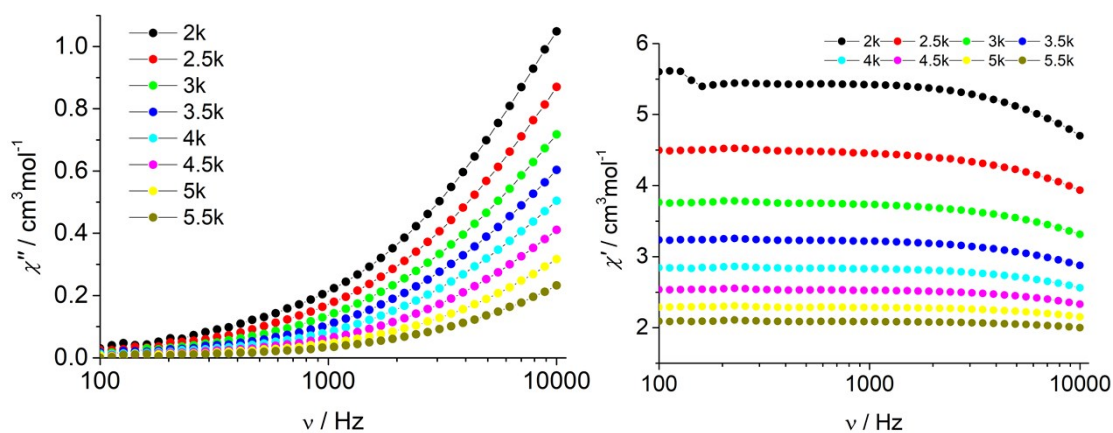

**Fig. S23** The frequency dependence of the out-of-phase ( $\chi''$ ) and the in-phase ( $\chi'$ ) ac susceptibility component under 0 Oe for complex 5.

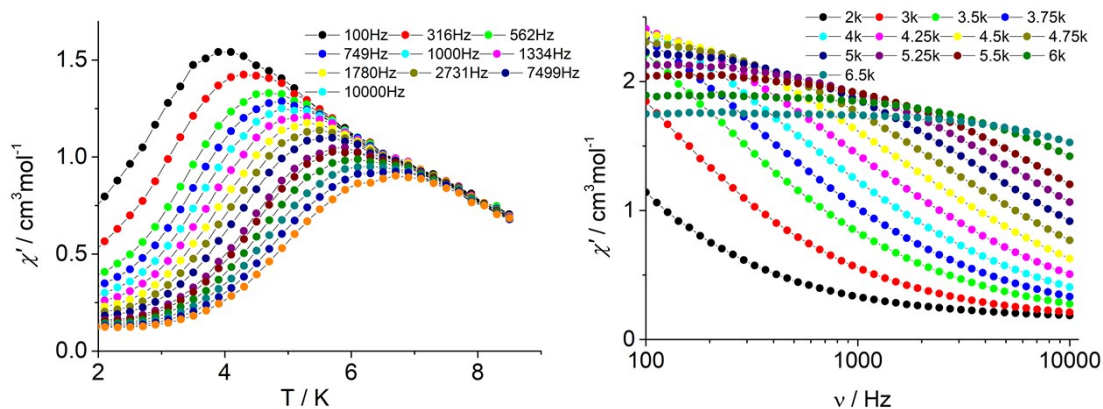

**Fig. S24** The temperature dependence of the in-phase ( $\chi'$ ) and the frequency dependence of the in-phase ( $\chi'$ ) ac susceptibility component under 700 Oe for complex 5.

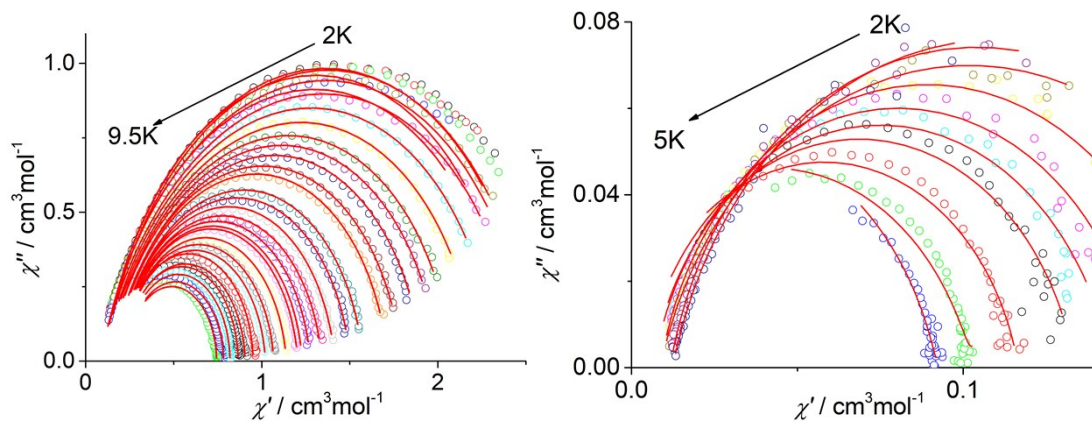

**Fig. S25** Cole-Cole (Argand) plot for **1Tb** and **1Nd** obtained using the ac susceptibility data. The solid lines correspond to the best fit obtained with a generalized Debye model under 1500 Oe and 2000 Oe.

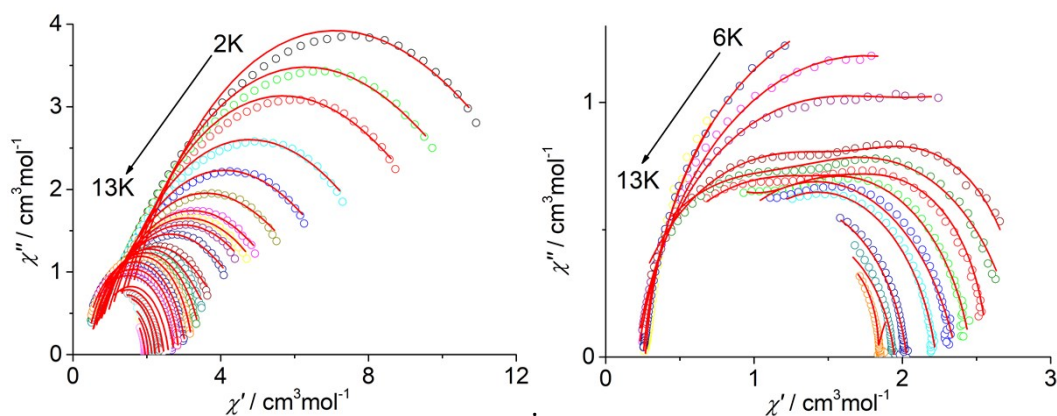

**Fig. S26** Cole-Cole (Argand) plot for **2** obtained using the ac susceptibility data. The solid lines correspond to the best fit obtained with a generalized Debye model under zero field and under 2000 Oe.

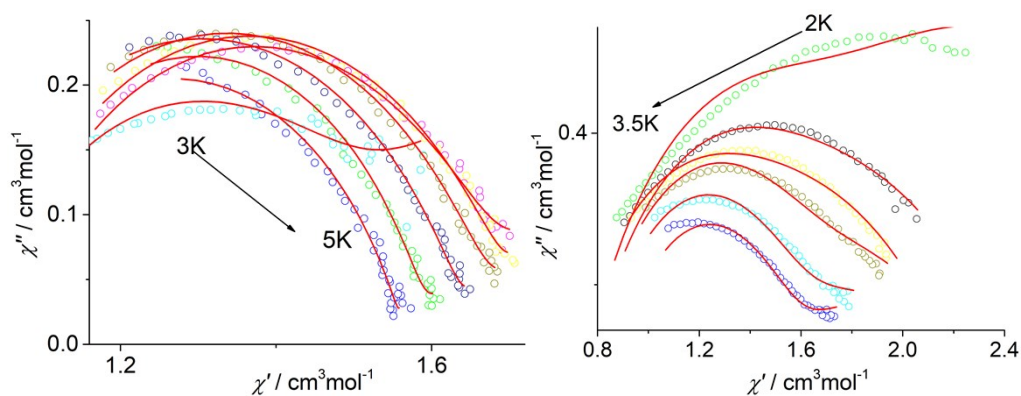

**Fig. S27** Cole-Cole (Argand) plot for **3** and **4** obtained using the ac susceptibility data. The solid lines correspond to the best fit obtained with a generalized Debye model under 700 Oe and 4000 Oe.

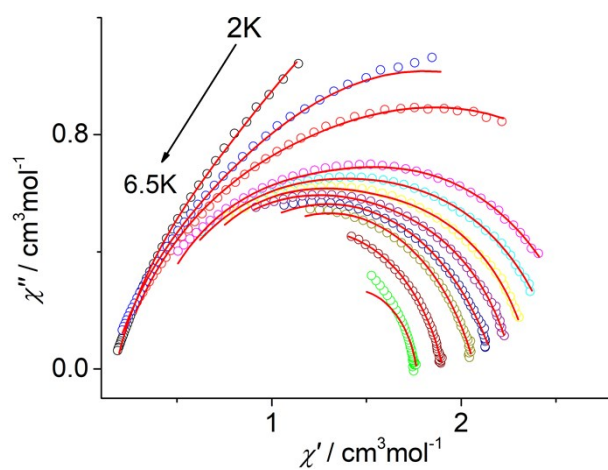

**Fig. S28** Cole-Cole (Argand) plot for **5** obtained using the ac susceptibility data. The solid lines correspond to the best fit obtained with a generalized Debye model under 900 Oe.

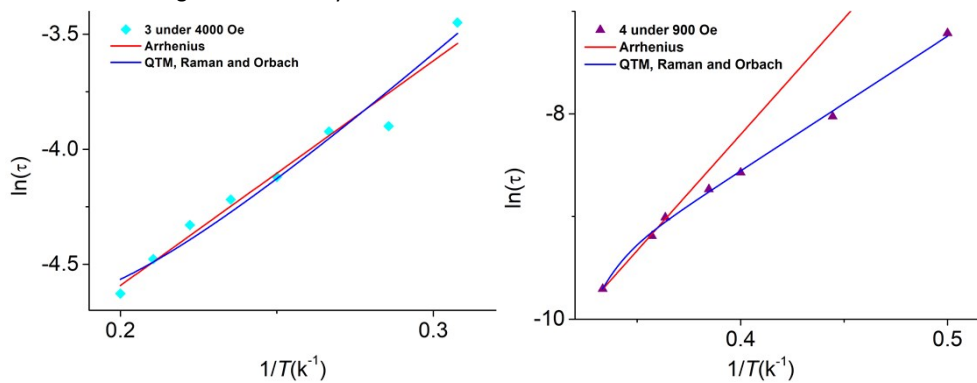

**Fig. S29** The  $\ln(\tau)$  vs.  $1/T$  plot for **3** and **4** based on the ac susceptibility data under optimum field

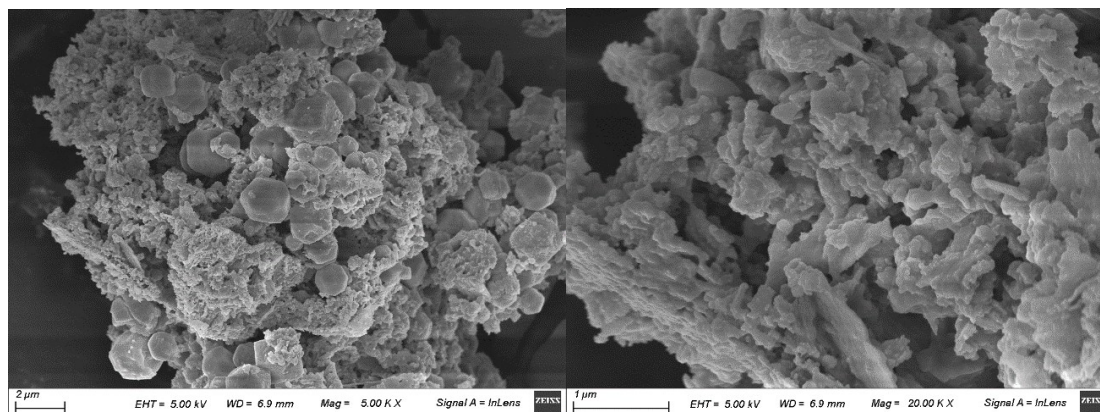

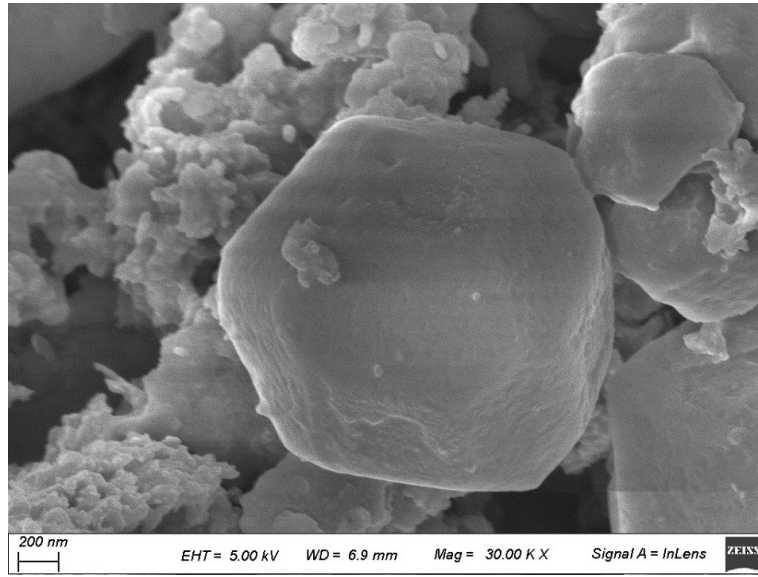

**Fig. S30** SEM image of the GaN-IM<sup>+</sup>-[Dy(DBM)<sub>4</sub>]<sup>-</sup>.

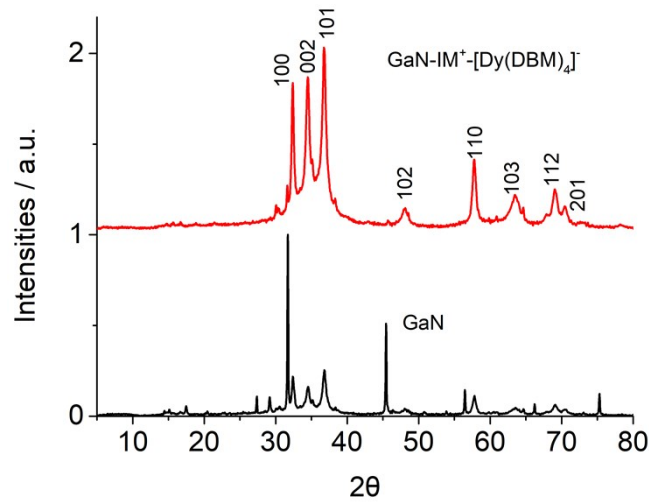

**Fig. S31** X-ray Diffraction (XRD) patterns for the pure GaN and GaN-IM<sup>+</sup>-[Dy(DBM)<sub>4</sub>]<sup>-</sup>.

**Table S8** Energy barriers obtained from the Arrhenius law fitting and Equation 1 of the out-of-phase ( $\chi''$ ) ac susceptibility data under optimum dc field.

| Relaxation processes | Orbach processes         |                      | Raman and Orbach processes   |       |                          |                        |
|----------------------|--------------------------|----------------------|------------------------------|-------|--------------------------|------------------------|
|                      | $U_{\text{eff}}/k_B$ (K) | $\tau_0$ (s)         | $C$ ( $s^{-1}\cdot K^{-n}$ ) | $n$   | $U_{\text{eff}}/k_B$ (K) | $\tau_0$ (s)           |
| <b>1(Tb)</b>         | 24.1                     | $1\times 10^{-7}$    | 20.796                       | 5.5   | 37.5                     | $2.243\times 10^{-7}$  |
| <b>1(Nd)</b>         | 23.7                     | $2\times 10^{-5}$    | 2.0098                       | 6     | 27.766                   | $1.956\times 10^{-7}$  |
| <b>2</b>             | 116.98                   | $6.1\times 10^{-10}$ | 0.152                        | 4.179 | 129.25                   | $1.172\times 10^{-10}$ |
| <b>3</b>             | 9.7                      | $1.7\times 10^{-3}$  | 2.0354                       | 2.43  | 13.12                    | $1.107\times 10^{-6}$  |



|          |      |                      |        |       |        |                         |
|----------|------|----------------------|--------|-------|--------|-------------------------|
| <b>4</b> | 22.6 | $3.2 \times 10^{-8}$ | 2      | 5.845 | 14.127 | $7.0744 \times 10^{-6}$ |
| <b>5</b> | 42.6 | $7.1 \times 10^{-9}$ | 14.232 | 3.393 | 55.58  | $5.85 \times 10^{-10}$  |

**Table S9** Energy barriers obtained from the Arrhenius law fitting and Equation 1 of the out-of-phase ( $\chi''$ ) ac susceptibility data under optimum 0 field.

| Relaxation processes | Orbach processes         |                      |                        | Raman, QTM and Orbach processes |       |                          |                    |
|----------------------|--------------------------|----------------------|------------------------|---------------------------------|-------|--------------------------|--------------------|
|                      | $U_{\text{eff}}/k_B$ (K) | $\tau_0$ (s)         | q                      | C ( $s^{-1} \cdot K^{-n}$ )     | n     | $U_{\text{eff}}/k_B$ (K) | $\tau_0$ (s)       |
| <b>2</b>             | 57.7                     | $8.3 \times 10^{-8}$ | $4.481 \times 10^{-4}$ | 0.73                            | 5.168 | 77.6                     | $2 \times 10^{-8}$ |

**Table S10** Best fitted parameters ( $\chi_T$ ,  $\chi_S$ ,  $\tau$  and  $\alpha$ ) with the extended Debye model for complex **2** at 0 Oe in the temperature range 2-13 K.

| T/ K | $\chi_S / \text{cm}^3 \text{mol}^{-1}$ | $\chi_T / \text{cm}^3 \text{mol}^{-1}$ | $\tau_1/s$ | $\alpha_1$ | $\tau_2/s$ | $\alpha_2$ | $\beta$ |
|------|----------------------------------------|----------------------------------------|------------|------------|------------|------------|---------|
| 2    | 1.19100                                | 13.66910                               | 0.00034    | 0.22722    | 0.00435    | 0.41695    | 0.71    |
| 2.25 | 1.045                                  | 12.19109                               | 0.00034    | 0.23       | 0.00441    | 0.42758    | 0.71    |
| 2.5  | 0.939                                  | 10.89701                               | 0.00034    | 0.23       | 0.00389    | 0.42987    | 0.71    |
| 3    | 0.75                                   | 8.79003                                | 0.00032    | 0.23       | 0.00146    | 0.39859    | 0.64673 |
| 3.5  | 0.67                                   | 7.67003                                | 0.00032    | 0.23       | 0.00212    | 0.41456    | 0.67183 |
| 4    | 0.568                                  | 7.08799                                | 0.00031    | 0.22999    | 0.00315    | 0.44       | 0.63914 |
| 4.5  | 0.513                                  | 6.03011                                | 0.00031    | 0.23       | 0.00169    | 0.43382    | 0.64116 |
| 4.75 | 0.46001                                | 5.52                                   | 0.00029    | 0.22999    | 0.00068    | 0.36224    | 0.4768  |
| 5    | 0.447                                  | 5.23305                                | 0.00024    | 0.22072    | 0.0006     | 0.32438    | 0.31092 |
| 5.5  | 0.45262                                | 5.41513                                | 0.00031    | 0.22972    | 0.01205    | 0.43997    | 0.70513 |
| 6.5  | 0.41720                                | 4.67600                                | 0.00027    | 0.19667    | 0.01673    | 0.44       | 0.71    |
| 7    | 0.43145                                | 4.198                                  | 0.00022    | 0.14118    | 0.01222    | 0.43678    | 0.71    |
| 7.5  | 0.33802                                | 3.17748                                | 0.0002     | 0.13001    | 0.00011    | 0.19342    | 0.71    |
| 8    | 0.37313                                | 2.87512                                | 0.00008    | 0.13       | 0.00015    | 0.08417    | 0.35785 |

|      |         |         |         |         |         |         |         |
|------|---------|---------|---------|---------|---------|---------|---------|
| 8.5  | 0.28569 | 2.77983 | 0.0001  | 0.13001 | 0.00006 | 0.11188 | 0.65875 |
| 9    | 0.28801 | 2.57572 | 0.00004 | 0.13258 | 0.0001  | 0.01571 | 0.70763 |
| 9.5  | 0.12323 | 2.61189 | 0.00005 | 0.13023 | 0.00001 | 0.14399 | 0.70957 |
| 10   | 0.56305 | 2.85397 | 0.00003 | 0.13002 | 0.50289 | 0.09290 | 0.71000 |
| 10.5 | 0.53028 | 2.72095 | 0.00002 | 0.13001 | 0.49744 | 0.09714 | 0.70999 |
| 11   | 0.56610 | 2.5     | 0.00002 | 0.13    | 0.49683 | 0.09553 | 0.70997 |
| 11.5 | 0.04884 | 2.16616 | 0.00002 | 0.13    | 0.00001 | 0.05724 | 0.31049 |
| 12   | 0.65500 | 2.08744 | 0.00001 | 0.13001 | 0.48120 | 0.09422 | 0.7097  |
| 12.5 | 0.30001 | 1.73601 | 0.00001 | 0.23    | 0.00001 | 0.05435 | 0.31042 |
| 13   | 0.19742 | 2.15106 | 0.00001 | 0.13124 | 0.00001 | 0.10000 | 0.70995 |

**Table S11** Best fitted parameters ( $\chi_T$ ,  $\chi_S$ ,  $\tau$  and  $\alpha$ ) with the extended Debye model for complex **1(Tb)** at 1500 Oe in the temperature range 2-9.5 K.

| T/ K | $\chi_S / \text{cm}^3$<br>$\text{mol}^{-1}$ | $\chi_T / \text{cm}^3$<br>$\text{mol}^{-1}$ | $\tau_1/\text{s}$ | $\alpha_1$ |
|------|---------------------------------------------|---------------------------------------------|-------------------|------------|
| 2    | 0.08444                                     | 2.40689                                     | 0.0005            | 0.15203    |
| 2.25 | 0.09755                                     | 2.43482                                     | 0.00043           | 0.12446    |
| 2.5  | 0.09186                                     | 2.53117                                     | 0.0004            | 0.13626    |
| 2.75 | 0.09898                                     | 2.54486                                     | 0.00036           | 0.1415     |
| 3    | 0.07956                                     | 2.52368                                     | 0.00032           | 0.16352    |
| 3.25 | 0.08204                                     | 2.47491                                     | 0.0003            | 0.18047    |
| 3.5  | 0.09618                                     | 2.34148                                     | 0.00026           | 0.17457    |
| 3.75 | 0.10241                                     | 2.22521                                     | 0.00023           | 0.1763     |
| 4    | 0.11589                                     | 2.08889                                     | 0.0002            | 0.16619    |
| 4.25 | 0.11883                                     | 2.01025                                     | 0.00018           | 0.16750    |
| 4.5  | 0.14265                                     | 1.91547                                     | 0.00016           | 0.15669    |

|      |         |         |         |         |
|------|---------|---------|---------|---------|
| 4.75 | 0.145   | 1.79692 | 0.00014 | 0.14606 |
| 5    | 0.15509 | 1.71746 | 0.00013 | 0.13773 |
| 5.5  | 0.16538 | 1.57695 | 0.0001  | 0.12993 |
| 5.75 | 0.169   | 1.50248 | 0.00009 | 0.12385 |
| 6    | 0.17122 | 1.41458 | 0.00009 | 0.11487 |
| 6.25 | 0.17151 | 1.3419  | 0.00008 | 0.1151  |
| 6.5  | 0.17916 | 1.27544 | 0.00007 | 0.09804 |
| 6.75 | 0.191   | 1.22979 | 0.00007 | 0.08608 |
| 7    | 0.19735 | 1.20401 | 0.00006 | 0.0794  |
| 7.25 | 0.19794 | 1.1392  | 0.00006 | 0.07987 |
| 7.5  | 0.19932 | 1.06787 | 0.00005 | 0.06558 |
| 7.75 | 0.20444 | 1.02029 | 0.00005 | 0.05763 |
| 8    | 0.213   | 0.95052 | 0.00004 | 0.01421 |
| 8.25 | 0.21904 | 0.93168 | 0.00004 | 0.0029  |
| 8.5  | 0.22325 | 0.90521 | 0.00004 | 0.02735 |
| 8.75 | 0.22575 | 0.86513 | 0.00004 | 0.00445 |
| 9    | 0.233   | 0.81921 | 0.00003 | 0.0033  |
| 9.25 | 0.23524 | 0.78315 | 0.00003 | 0.01761 |
| 9.5  | 0.23472 | 0.74365 | 0.00003 | 0.00969 |

**Table S12** Best fitted parameters ( $\chi_T$ ,  $\chi_S$ ,  $\tau$  and  $\alpha$ ) with the extended Debye model for complex **1(Nd)** at 2000 Oe in the temperature range 2-9.5 K.

| T/ K | $\chi_S / \text{cm}^3 \text{mol}^{-1}$ | $\chi_T / \text{cm}^3 \text{mol}^{-1}$ | $\tau_1/\text{s}$ | $\alpha_1$ | $\tau_2/\text{s}$ | $\alpha_2$ | $\beta$ |
|------|----------------------------------------|----------------------------------------|-------------------|------------|-------------------|------------|---------|
| 2    | 0.01248                                | 0.3314                                 | 0.00185           | 0.15437    | 0.1982            | 0.11555    | 0.56742 |
| 2.25 | 0.01162                                | 0.41357                                | 0.00127           | 0.13724    | 0.25127           | 0.04242    | 0.43668 |

|      |         |         |         |         |         |         |         |
|------|---------|---------|---------|---------|---------|---------|---------|
| 2.5  | 0.0086  | 0.35664 | 0.00088 | 0.17427 | 0.17143 | 0.2202  | 0.49674 |
| 2.75 | 0.00868 | 0.36435 | 0.00051 | 0.13038 | 0.30761 | 0.0586  | 0.44034 |
| 3    | 0.00670 | 0.24089 | 0.0003  | 0.13012 | 0.505   | 0.01792 | 0.61159 |
| 3.25 | 0.00609 | 0.20248 | 0.00018 | 0.13028 | 0.505   | 0.27731 | 0.67881 |
| 3.5  | 0.0037  | 0.39802 | 0.00011 | 0.13009 | 0.505   | 0.1     | 0.32629 |
| 4    | 0.00024 | 0.21956 | 0.00004 | 0.13    | 0.33986 | 0.07185 | 0.53198 |
| 4.5  | 0.01742 | 0.24748 | 0.00001 | 0.16494 | 0.18428 | 0.21098 | 0.48372 |
| 5    | 0.04664 | 0.34899 | 0.00004 | 0.149   | 0.34255 | 0.08459 | 0.39739 |

**Table S13** Best fitted parameters ( $\chi_T$ ,  $\chi_S$ ,  $\tau$  and  $\alpha$ ) with the extended Debye model for complex **2** at 2000 Oe in the temperature range 6-13 K.

| T/ K | $\chi_S / \text{cm}^3$<br>mol <sup>-1</sup> | $\chi_T / \text{cm}^3$<br>mol <sup>-1</sup> | $\tau_1/s$ | $\alpha_1$ | $\tau_2/s$ | $\alpha_2$ | $\beta$ |
|------|---------------------------------------------|---------------------------------------------|------------|------------|------------|------------|---------|
| 6    | 0.2651                                      | 2.8                                         | 0.00494    | 0.13       | 0.00314    | 0.09978    | 0.70923 |
| 6.5  | 0.25094                                     | 3.18792                                     | 0.00378    | 0.15807    | 0.00202    | 0.02491    | 0.53207 |
| 7    | 0.21661                                     | 4.48037                                     | 0.00113    | 0.1355     | 0.01753    | 0.02062    | 0.57483 |
| 7.5  | 0.20466                                     | 3.20016                                     | 0.00044    | 0.13       | 0.00307    | 0.08704    | 0.66179 |
| 8    | 0.17783                                     | 3                                           | 0.00017    | 0.13012    | 0.00132    | 0.08592    | 0.52614 |
| 8.5  | 0.09828                                     | 2.71688                                     | 0.00009    | 0.18914    | 0.00072    | 0.09976    | 0.68876 |
| 9    | 0.055                                       | 2.72471                                     | 0.00029    | 0.13612    | 0.00003    | 0.12252    | 0.5709  |
| 9.5  | 0.08001                                     | 2.50002                                     | 0.00003    | 0.22997    | 0.00023    | 0.06544    | 0.71    |
| 10   | 0.05272                                     | 2.41333                                     | 0.00008    | 0.13       | 0.00001    | 0.07977    | 0.65444 |
| 10.5 | 0.46999                                     | 2.80436                                     | 0.00003    | 0.19965    | 0.50141    | 0.09661    | 0.67602 |
| 11   | 0.63467                                     | 2.46410                                     | 0.00002    | 0.13       | 0.50271    | 0.09744    | 0.64610 |
| 11.5 | 0.56238                                     | 2.22622                                     | 0.00001    | 0.13001    | 0.50010    | 0.09656    | 0.69976 |
| 12   | 0.57005                                     | 2.05537                                     | 0.00001    | 0.13       | 0.50496    | 0.04817    | 0.70999 |

|      |         |       |         |      |         |         |         |
|------|---------|-------|---------|------|---------|---------|---------|
| 12.5 | 0.78230 | 1.641 | 0.00001 | 0.13 | 0.32479 | 0.09669 | 0.70997 |
| 13   | 1.11002 | 1.546 | 0.01111 | 0.13 | 0.00001 | 0.07279 | 0.53285 |

**Table S14** Best fitted parameters ( $\chi_T$ ,  $\chi_S$ ,  $\tau$  and  $\alpha$ ) with the extended Debye model for complex **3** at 4000 Oe in the temperature range 3.5-5.5 K.

| T/ K | $\chi_S / \text{cm}^3$<br>mol <sup>-1</sup> | $\chi_T / \text{cm}^3$<br>mol <sup>-1</sup> | $\tau_1/s$ | $\alpha_1$ | $\tau_2/s$ | $\alpha_2$ | $\beta$ |
|------|---------------------------------------------|---------------------------------------------|------------|------------|------------|------------|---------|
| 3.5  | 1.01803                                     | 1.41454                                     | 0.00008    | 0.22946    | 0.02616    | 0.43981    | 0.32385 |
| 4    | 1.05383                                     | 1.3821                                      | 0.00007    | 0.22998    | 0.04379    | 0.25876    | 0.45144 |
| 4.2  | 1.03755                                     | 1.71303                                     | 0.00006    | 0.22896    | 0.20071    | 0.41099    | 0.37583 |
| 4.5  | 1.02128                                     | 1.74027                                     | 0.00005    | 0.23       | 0.12435    | 0.2042     | 0.39236 |
| 4.7  | 0.98962                                     | 1.42558                                     | 0.00003    | 0.22993    | 0.19369    | 0.35329    | 0.48239 |
| 5    | 0.96419                                     | 1.94891                                     | 0.00003    | 0.23       | 0.45076    | 0.27747    | 0.34857 |
| 5.2  | 1.00293                                     | 1.59057                                     | 0.00002    | 0.17971    | 0.505      | 0.38228    | 0.36901 |
| 5.5  | 0.97331                                     | 1.50795                                     | 0.00002    | 0.23       | 0.07894    | 0.08592    | 0.39295 |

**Table S15** Best fitted parameters ( $\chi_T$ ,  $\chi_S$ ,  $\tau$  and  $\alpha$ ) with the extended Debye model for complex **4** at 900 Oe in the temperature range 3.5-5.5 K.

| T/ K | $\chi_S / \text{cm}^3$<br>mol <sup>-1</sup> | $\chi_T / \text{cm}^3$<br>mol <sup>-1</sup> | $\tau_1/s$ | $\alpha_1$ | $\tau_2/s$ | $\alpha_2$ | $\beta$ |
|------|---------------------------------------------|---------------------------------------------|------------|------------|------------|------------|---------|
| 2    | 0.70632                                     | 2.692                                       | 0.00008    | 0.22999    | 0.00273    | 0.38863    | 0.31    |
| 2.6  | 0.70903                                     | 1.78123                                     | 0.00006    | 0.21907    | 0.0007     | 0.43467    | 0.35895 |
| 2.8  | 0.64                                        | 1.63823                                     | 0.00003    | 0.22243    | 0.00036    | 0.43996    | 0.33005 |
| 3    | 0.72321                                     | 1.61001                                     | 0.00004    | 0.23       | 0.0014     | 0.43987    | 0.51445 |
| 3.25 | 0.75605                                     | 1.49220                                     | 0.00004    | 0.22997    | 0.00327    | 0.43964    | 0.54108 |
| 3.5  | 0.82298                                     | 1.41533                                     | 0.00003    | 0.22973    | 0.00581    | 0.43995    | 0.5148  |

**Table S16** Best fitted parameters ( $\chi_T$ ,  $\chi_S$ ,  $\tau$  and  $\alpha$ ) with the extended Debye model for complex **5** at 700 Oe in the temperature range 3.5-6.5 K.

| T/ K | $\chi_S / \text{cm}^3 \text{mol}^{-1}$ | $\chi_T / \text{cm}^3 \text{mol}^{-1}$ | $\tau_1 / \text{s}$ | $\alpha_1$ |
|------|----------------------------------------|----------------------------------------|---------------------|------------|
| 3.5  | 0.22304                                | 2.42685                                | 0.00043             | 0.18998    |
| 4    | 0.309                                  | 2.61593                                | 0.00027             | 0.25664    |
| 4.25 | 0.40904                                | 2.56423                                | 0.0002              | 0.25412    |
| 4.5  | 0.52808                                | 2.43881                                | 0.00013             | 0.22184    |
| 5    | 0.82278                                | 2.22392                                | 0.00007             | 0.13549    |
| 5.5  | 1.10409                                | 2.0344                                 | 0.00004             | 0.0202     |
| 6    | 1.321                                  | 1.90283                                | 0.00003             | 0.00035    |
| 6.5  | 1.42866                                | 1.7654                                 | 0.00002             | 0.0003     |

**Table S17** Parameters involved in the SAP geometry for complexes **1-5** compared to the ideal geometry

| Parameters                                   | <b>1Tb</b> | <b>1Nd</b> | <b>2</b>  | <b>3</b>  | <b>4</b>  | <b>5</b>  | <b>Ideal SAP</b>                |
|----------------------------------------------|------------|------------|-----------|-----------|-----------|-----------|---------------------------------|
| <b>Skew angle (<math>\varnothing</math>)</b> | 42.87°     | 44.64°     | 47.33°    | 45.36°    | 45.98°    | 45.87°    | 45°                             |
| $\gamma$                                     | 114.58°    | 113.93°    | 113.26°   | 116.54°   | 113.95°   | 116.97°   | 109.48°                         |
| <b>magic angles (<math>\alpha</math>)</b>    | 56.34°     | 56.86°     | 57.47°    | 60.61°    | 57.27°    | 59.47°    | 54.7356°                        |
| $d_{\text{in}}$ (Å)                          | 2.79       | 2.86       | 2.78      | 2.82      | 2.77      | 2.86      | $d_{\text{in}} = d_{\text{pp}}$ |
| $d_{\text{pp}} / d_{\text{pp}}^*$ (Å)        | 2.54/2.58  | 2.63/2.61  | 2.15/1.97 | 2.44/2.33 | 2.55/2.45 | 2.44/2.42 |                                 |
| $\sigma_{\varnothing}^2$                     | 2.13       | 2.65       | 17.07     | 4.10      | 1.75      | 4.41      | 0                               |
| $\sigma_{\alpha}^2$                          | 4.87       | 7.32       | 10.33     | 42.91     | 9.211     | 33.35     | 0                               |

**Table S18** The details for parameters involved in SAP geometry for **1Tb** and **1Nd**

| <b>Skew angle (<math>\varnothing</math>) of complex 1Tb (°)</b>                               |                            | <b>Skew angle (<math>\varnothing</math>) of complex 1Nd (°)</b>                               |                            |
|-----------------------------------------------------------------------------------------------|----------------------------|-----------------------------------------------------------------------------------------------|----------------------------|
| $\varnothing_1 = 42.87(1)$                                                                    | $\varnothing_2 = 45.71(1)$ | $\varnothing_1 = 42.96(1)$                                                                    | $\varnothing_2 = 45.98(1)$ |
| $\varnothing_3 = 43.33(2)$                                                                    | $\varnothing_4 = 45.87(2)$ | $\varnothing_3 = 43.16(1)$                                                                    | $\varnothing_4 = 46.46(1)$ |
| Mean value of $\varnothing = 42.87(1)$                                                        |                            | Mean value of $\varnothing = 44.64(2)$                                                        |                            |
| <b>Parameter <math>\gamma</math> and magic angles <math>\alpha</math> for complex 1Tb (°)</b> |                            | <b>Parameter <math>\gamma</math> and magic angles <math>\alpha</math> for complex 1Nd (°)</b> |                            |

|                                                                                     |                                         |                                                                                     |                                         |
|-------------------------------------------------------------------------------------|-----------------------------------------|-------------------------------------------------------------------------------------|-----------------------------------------|
| $\gamma(\text{O1-Dy1-O3}) = 112.55(2)$                                              | $\alpha(\text{O1-O3}) = 55.32(1)$       | $\gamma(\text{O1-Dy1-O3}) = 112.27(2)$                                              | $\alpha(\text{O1-O3}) = 56.27(1)$       |
| $\gamma(\text{O8-Dy1-O6}) = 114.14(2)$                                              | $\alpha(\text{O2-O4}) = 57.84(1)$       | $\gamma(\text{O2-Dy1-O4}) = 116.43(2)$                                              | $\alpha(\text{O2-O4}) = 58.25(1)$       |
| $\gamma(\text{O2-Dy1-O4}) = 115.47(2)$                                              | $\alpha(\text{O5-O7}) = 57.81(1)$       | $\gamma(\text{O5-Dy1-O7}) = 117.03(2)$                                              | $\alpha(\text{O5-O7}) = 58.53(1)$       |
| $\gamma(\text{O7-Dy1-O5}) = 116.16(2)$                                              | $\alpha(\text{O6-O8}) = 54.42(1)$       | $\gamma(\text{O6-Dy1-O8}) = 110.02(2)$                                              | $\alpha(\text{O6-O8}) = 54.42(1)$       |
| Mean value of $\gamma = 114.58$                                                     | Mean value of $\alpha = 56.34$          | Mean value of $\gamma = 113.93$                                                     | Mean value of $\alpha = 56.86$          |
| <b>Values of <math>d_{\text{in}}</math> for 1Tb (Å)</b>                             |                                         | <b>Values of <math>d_{\text{in}}</math> for 1Nd (Å)</b>                             |                                         |
| $d_{\text{in}}(\text{O1-O4}) = 2.83(8)$                                             | $d_{\text{in}}(\text{O5-O6}) = 2.99(6)$ | $d_{\text{in}}(\text{O1-O2}) = 2.75(8)$                                             | $d_{\text{in}}(\text{O5-O6}) = 2.74(6)$ |
| $d_{\text{in}}(\text{O2-O3}) = 2.87(8)$                                             | $d_{\text{in}}(\text{O6-O7}) = 2.76(6)$ | $d_{\text{in}}(\text{O3-O4}) = 2.74(8)$                                             | $d_{\text{in}}(\text{O7-O8}) = 2.74(6)$ |
| $d_{\text{in}}(\text{O1-O2}) = 2.71(8)$                                             | $d_{\text{in}}(\text{O7-O8}) = 2.74(6)$ | $d_{\text{in}}(\text{O2-O3}) = 2.84(8)$                                             | $d_{\text{in}}(\text{O5-O8}) = 2.97(6)$ |
| $d_{\text{in}}(\text{O3-O4}) = 2.71(8)$                                             | $d_{\text{in}}(\text{O5-O8}) = 2.73(6)$ | $d_{\text{in}}(\text{O1-O4}) = 3.17(8)$                                             | $d_{\text{in}}(\text{O6-O7}) = 2.99(6)$ |
| Mean value of $d_{\text{in}} = 2.79(6)$                                             |                                         | Mean value of $d_{\text{in}} = 2.86(6)$                                             |                                         |
| <b><math>d_{\text{pp}}(\text{A-B})</math> in 1Tb (Å)</b>                            |                                         | <b><math>d_{\text{pp}}(\text{A-B})</math> in 1Nd (Å)</b>                            |                                         |
| $d_{\text{pp}}(\text{O1-B}) = 2.58(5)$                                              | $d_{\text{pp}}(\text{O2-B}) = 2.55(5)$  | $d_{\text{pp}}(\text{O1-B}) = 2.67(5)$                                              | $d_{\text{pp}}(\text{O2-B}) = 2.62(5)$  |
| $d_{\text{pp}}(\text{O3-B}) = 2.55(5)$                                              | $d_{\text{pp}}(\text{O4-B}) = 2.48(5)$  | $d_{\text{pp}}(\text{O3-B}) = 2.73(5)$                                              | $d_{\text{pp}}(\text{O4-B}) = 2.51(5)$  |
| Mean value of $d_{\text{pp}}(\text{A-B}) = 2.54(5)$                                 |                                         | Mean value of $d_{\text{pp}}(\text{A-B}) = 2.63(5)$                                 |                                         |
| <b><math>\sigma_{\emptyset}^2</math> and <math>\sigma_{\alpha}^2</math> for 1Tb</b> |                                         | <b><math>\sigma_{\emptyset}^2</math> and <math>\sigma_{\alpha}^2</math> for 1Nd</b> |                                         |
| $\sigma_{\emptyset}^2 = 2.13, \sigma_{\alpha}^2 = 4.87$                             |                                         | $\sigma_{\emptyset}^2 = 2.65, \sigma_{\alpha}^2 = 7.32$                             |                                         |

**Table S19** The details for parameters involved in SAP geometry for **2** and **3**

| <b>Skew angle (<math>\emptyset</math>) of complex 2 (°)</b>                                 |                                   | <b>Skew angle (<math>\emptyset</math>) of complex 3 (°)</b>                                 |                                   |
|---------------------------------------------------------------------------------------------|-----------------------------------|---------------------------------------------------------------------------------------------|-----------------------------------|
| $\emptyset_1 = 43.877(1)$                                                                   | $\emptyset_2 = 50.335(1)$         | $\emptyset_1 = 44.32(1)$                                                                    | $\emptyset_2 = 46.05(1)$          |
| $\emptyset_3 = 43.993(2)$                                                                   | $\emptyset_4 = 51.128(2)$         | $\emptyset_3 = 44.07(1)$                                                                    | $\emptyset_4 = 47.02(1)$          |
| Mean value of $\emptyset = 47.335(1)$                                                       |                                   | Mean value of $\emptyset = 45.36(2)$                                                        |                                   |
| <b>Parameter <math>\gamma</math> and magic angles <math>\alpha</math> for complex 2 (°)</b> |                                   | <b>Parameter <math>\gamma</math> and magic angles <math>\alpha</math> for complex 3 (°)</b> |                                   |
| $\gamma(\text{O1-Dy1-O3}) = 108.37(2)$                                                      | $\alpha(\text{O1-O3}) = 54.76(1)$ | $\gamma(\text{O1-Dy1-O3}) = 111.86(2)$                                                      | $\alpha(\text{O1-O3}) = 55.51(1)$ |
| $\gamma(\text{O2-Dy1-O4}) = 118.21(2)$                                                      | $\alpha(\text{O2-O4}) = 57.51(1)$ | $\gamma(\text{O2-Dy1-O4}) = 122.35(2)$                                                      | $\alpha(\text{O2-O4}) = 60.73(1)$ |

|                                                                              |                                         |                                                                              |                                         |
|------------------------------------------------------------------------------|-----------------------------------------|------------------------------------------------------------------------------|-----------------------------------------|
| $\gamma(\text{O5-Dy1-O7}) = 108.62(2)$                                       | $\alpha(\text{O5-O7}) = 59.28(1)$       | $\gamma(\text{O5-Dy1-O7}) = 112.44(2)$                                       | $\alpha(\text{O6-O8}) = 56.88(1)$       |
| $\gamma(\text{O6-Dy1-O8}) = 117.85(2)$                                       | $\alpha(\text{O6-O8}) = 58.32(1)$       | $\gamma(\text{O6-Dy1-O8}) = 119.54(2)$                                       | $\alpha(\text{O5-O7}) = 69.32(1)$       |
| Mean value of $\gamma = 113.26$                                              | Mean value of $\alpha = 57.47$          | Mean value of $\gamma = 116.54$                                              | Mean value of $\alpha = 60.61$          |
| <b>Values of <math>d_{\text{in}}</math> for 2 (Å)</b>                        |                                         | <b>Values of <math>d_{\text{in}}</math> for 3 (Å)</b>                        |                                         |
| $d_{\text{in}}(\text{O1-O2}) = 2.72(8)$                                      | $d_{\text{in}}(\text{O5-O6}) = 2.87(6)$ | $d_{\text{in}}(\text{O1-O2}) = 2.93(8)$                                      | $d_{\text{in}}(\text{O5-O6}) = 2.88(6)$ |
| $d_{\text{in}}(\text{O3-O4}) = 2.70(6)$                                      | $d_{\text{in}}(\text{O7-O8}) = 2.86(6)$ | $d_{\text{in}}(\text{O3-O4}) = 2.76(8)$                                      | $d_{\text{in}}(\text{O7-O8}) = 2.72(6)$ |
| $d_{\text{in}}(\text{O2-O3}) = 2.81(8)$                                      | $d_{\text{in}}(\text{O6-O7}) = 2.73(6)$ | $d_{\text{in}}(\text{O2-O3}) = 2.85(8)$                                      | $d_{\text{in}}(\text{O6-O7}) = 2.91(6)$ |
| $d_{\text{in}}(\text{O1-O4}) = 2.88(8)$                                      | $d_{\text{in}}(\text{O5-O8}) = 2.73(6)$ | $d_{\text{in}}(\text{O1-O4}) = 2.81(8)$                                      | $d_{\text{in}}(\text{O5-O8}) = 2.75(6)$ |
| Mean value of $d_{\text{in}} = 2.78(6)$                                      |                                         | Mean value of $d_{\text{in}} = 2.82(6)$                                      |                                         |
| <b><math>d_{\text{pp}}(\text{A-B})</math> in 2 (Å)</b>                       |                                         | <b><math>d_{\text{pp}}(\text{A-B})</math> in 3 (Å)</b>                       |                                         |
| $d_{\text{pp}}(\text{O1-B}) = 2.468(5)$                                      | $d_{\text{pp}}(\text{O2-B}) = 2.457(5)$ | $d_{\text{pp}}(\text{O1-B}) = 2.46(5)$                                       | $d_{\text{pp}}(\text{O2-B}) = 2.23(5)$  |
| $d_{\text{pp}}(\text{O3-B}) = 1.852(5)$                                      | $d_{\text{pp}}(\text{O4-B}) = 1.853(5)$ | $d_{\text{pp}}(\text{O3-B}) = 2.65(5)$                                       | $d_{\text{pp}}(\text{O4-B}) = 2.44(5)$  |
| Mean value of $d_{\text{pp}}(\text{A-B}) = 2.157(5)$                         |                                         | Mean value of $d_{\text{pp}}(\text{A-B}) = 2.44(5)$                          |                                         |
| <b><math>\sigma_{\phi}^2</math> and <math>\sigma_{\alpha}^2</math> for 2</b> |                                         | <b><math>\sigma_{\phi}^2</math> and <math>\sigma_{\alpha}^2</math> for 3</b> |                                         |
| $\sigma_{\phi}^2 = 17.07, \sigma_{\alpha}^2 = 10.33$                         |                                         | $\sigma_{\phi}^2 = 4.10, \sigma_{\alpha}^2 = 42.91$                          |                                         |

**Table S20** The details for parameters involved in SAP geometry for **4** and **5**

| <b>Skew angle (<math>\phi</math>) of complex 4 (°)</b>                                      |                                   | <b>Skew angle (<math>\phi</math>) of complex 5 (°)</b>                                      |                                   |
|---------------------------------------------------------------------------------------------|-----------------------------------|---------------------------------------------------------------------------------------------|-----------------------------------|
| $\phi_1 = 45.11(1)$                                                                         | $\phi_2 = 46.19(1)$               | $\phi_1 = 43.85(1)$                                                                         | $\phi_2 = 47.51(1)$               |
| $\phi_3 = 45.31(1)$                                                                         | $\phi_4 = 47.34(1)$               | $\phi_3 = 44.09(1)$                                                                         | $\phi_4 = 48.03(1)$               |
| Mean value of $\phi = 45.98(2)$                                                             |                                   | Mean value of $\phi = 45.87(2)$                                                             |                                   |
| <b>Parameter <math>\gamma</math> and magic angles <math>\alpha</math> for complex 4 (°)</b> |                                   | <b>Parameter <math>\gamma</math> and magic angles <math>\alpha</math> for complex 5 (°)</b> |                                   |
| $\gamma(\text{O1-Dy1-O3}) = 117.00(2)$                                                      | $\alpha(\text{O1-O3}) = 59.77(1)$ | $\gamma(\text{O1-Dy1-O3}) = 114.00(2)$                                                      | $\alpha(\text{O1-O3}) = 61.45(1)$ |
| $\gamma(\text{O2-Dy1-O4}) = 111.91(2)$                                                      | $\alpha(\text{O2-O4}) = 55.68(1)$ | $\gamma(\text{O2-Dy1-O4}) = 119.59(2)$                                                      | $\alpha(\text{O2-O4}) = 62.56(1)$ |
| $\gamma(\text{O5-Dy1-O7}) = 110.17(2)$                                                      | $\alpha(\text{O5-O7}) = 55.86(1)$ | $\gamma(\text{O5-Dy1-O7}) = 116.62(2)$                                                      | $\alpha(\text{O6-O8}) = 54.00(1)$ |
| $\gamma(\text{O6-Dy1-O8}) = 116.73(2)$                                                      | $\alpha(\text{O6-O8}) = 57.77(1)$ | $\gamma(\text{O6-Dy1-O8}) = 117.68(2)$                                                      | $\alpha(\text{O5-O7}) = 59.87(1)$ |



|                                                                                   |                                |                                                                                     |                                |
|-----------------------------------------------------------------------------------|--------------------------------|-------------------------------------------------------------------------------------|--------------------------------|
| Mean value of $\gamma = 113.95$                                                   | Mean value of $\alpha = 57.27$ | Mean value of $\gamma = 116.97$                                                     | Mean value of $\alpha = 59.47$ |
| <b>Values of <math>d_{in}</math> for 4 (Å)</b>                                    |                                | <b>Values of <math>d_{in}</math> for 5 (Å)</b>                                      |                                |
| $d_{in}(O1-O2) = 2.71(8)$                                                         | $d_{in}(O5-O6) = 2.71(6)$      | $d_{in}(O1-O2) = 2.97(8)$                                                           | $d_{in}(O5-O6) = 2.70(6)$      |
| $d_{in}(O3-O4) = 2.75(6)$                                                         | $d_{in}(O7-O8) = 2.71(6)$      | $d_{in}(O3-O4) = 2.74(8)$                                                           | $d_{in}(O7-O8) = 2.94(6)$      |
| $d_{in}(O2-O3) = 2.82(8)$                                                         | $d_{in}(O6-O7) = 2.79(6)$      | $d_{in}(O2-O3) = 2.88(8)$                                                           | $d_{in}(O6-O7) = 2.90(6)$      |
| $d_{in}(O1-O4) = 2.90(8)$                                                         | $d_{in}(O5-O8) = 2.83(6)$      | $d_{in}(O1-O4) = 2.88(8)$                                                           | $d_{in}(O5-O8) = 2.93(6)$      |
| Mean value of $d_{in} = 2.77(6)$                                                  |                                | Mean value of $d_{in} = 2.86(6)$                                                    |                                |
| <b><math>d_{pp}(A-B)</math> in 4 (Å)</b>                                          |                                | <b><math>d_{pp}(A-B)</math> in 5 (Å)</b>                                            |                                |
| $d_{pp}(O1-B) = 2.46(5)$                                                          | $d_{pp}(O2-B) = 2.59(5)$       | $d_{pp}(O1-B) = 2.48(5)$                                                            | $d_{pp}(O2-B) = 2.45(5)$       |
| $d_{pp}(O3-B) = 2.57(5)$                                                          | $d_{pp}(O4-B) = 2.58(5)$       | $d_{pp}(O3-B) = 2.54(5)$                                                            | $d_{pp}(O4-B) = 2.32(5)$       |
| Mean value of $d_{pp}(A-B) = 2.55(5)$                                             |                                | Mean value of $d_{pp}(A-B) = 2.44(5)$                                               |                                |
| <b><math>\sigma_{\emptyset}^2</math> and <math>\sigma_{\alpha}^2</math> for 4</b> |                                | <b><math>\sigma_{\emptyset}^2</math> and <math>\sigma_{\alpha}^2</math> for 1Nd</b> |                                |
| $\sigma_{\emptyset}^2 = 1.75, \sigma_{\alpha}^2 = 9.21$                           |                                | $\sigma_{\emptyset}^2 = 4.41, \sigma_{\alpha}^2 = 33.35$                            |                                |

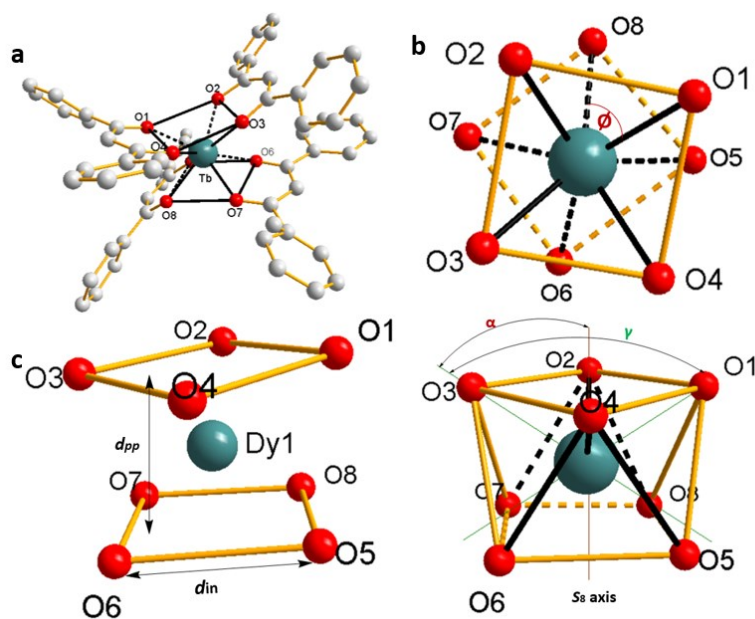

**Fig. S32** (a) Crystal structure of **1Tb**. (b) Skew angle ( $\emptyset$ ) for the SAP coordination geometry. (c) Scheme showing the parameters  $d_{in}$ ,  $d_{pp}$ ,  $\alpha$  and  $\gamma$  for the SAP coordination geometry.

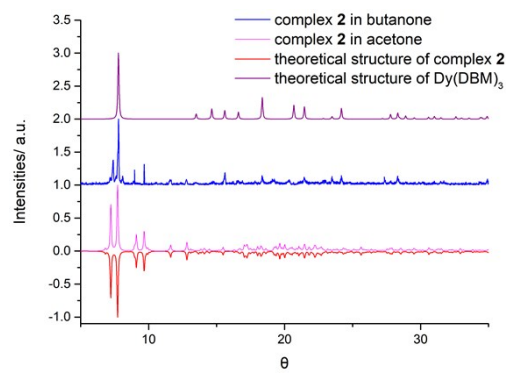

**Fig. S33** X-ray Diffraction (XRD) patterns for **2** stirring in butanone and acetone, and the theoretical structure of **2** and Dy(DBM)<sub>3</sub>.
